# Supplementary material for: Alkoxyhydrosilane-facilitated cross-etherification reaction of secondary benzyl alcohol with aliphatic alcohol: synthesis of unsymmetrical dialkyl ethers
Source: Royal Society of Chemistry journal article supplement (doi:10.1039/d4ra05997b), 2024-01-01

# **Alkoxyhydrosilane–Facilitated Cross-Etherification Reaction of Secondary Benzyl Alcohol with Aliphatic Alcohol: Synthesis of Unsymmetrical Dialkyl Ethers**

Toru Hashimoto,<sup>\*1,2</sup> Yakumo Matsunaga,<sup>1</sup> Yuki Okamura,<sup>1</sup>

Sosuke Takao,<sup>1</sup> and Makoto Hojo<sup>\*1</sup>

<sup>1</sup> *Department of Applied Chemistry, Faculty of Engineering, Sanyo-Onoda City*

*University, 1-1-1 Daigaku-dori, Sanyo-Onoda, 756-0884, Japan.*

<sup>2</sup> *School of Engineering, Tokyo University of Technology, Hachioji, 192-0982, Japan*

## **Table of contents**

|                                                    |      |
|----------------------------------------------------|------|
| General Procedures                                 | S-2  |
| Experimental Procedures                            | S-3  |
| Product Characterization Data                      | S-5  |
| References                                         | S-14 |
| <sup>1</sup> H NMR and <sup>13</sup> C NMR Spectra | S-15 |

## General procedures.

The reactions were performed under Ar atmosphere using oven-dried glassware. Alcohols **1a**, **1e**, **1f**, **1i**, **1j**, **1k**, **1m**, **1p**, **1q**, and **1r** were purchased from Sigma-Aldrich Co. LLC or TCI Co., Ltd.. Alcohols **1b**, **1c**, **1d**, **1g**, **1h**, **1l**, **1n**, **1o**, **1s**, and **1t** were prepared by the reduction of the corresponding ketones using NaBH<sub>4</sub>. Alcohol **1u** was prepared by the reaction of crotonaldehyde with PhMgBr.<sup>1</sup> Chiral alcohol (*S*)-**1j** was prepared by the Rh(pybox) catalyzed asymmetric hydrosilylation of the corresponding ketone.<sup>2</sup> The lignin model compound **1v** was prepared by the literature procedures.<sup>3</sup> (EtO)<sub>2</sub>MeSiH, (EtO)<sub>2</sub>Me<sub>2</sub>Si, (EtO)<sub>2</sub>MePhSi, (EtO)<sub>3</sub>SiH, (EtO)<sub>4</sub>Si, Me<sub>2</sub>PhSiH, and MePh<sub>2</sub>SiH were purchased from TCI Co., Ltd. and Ph<sub>3</sub>SiH, and *t*-BuMe<sub>2</sub>SiH were purchased from Sigma-Aldrich Co. LLC.. Orgnosilane compounds were distilled prior to use and stored at an Ar atmosphere. All other reagents employed in this study were obtained from common commercial suppliers and used without further purification.

Proton nuclear magnetic resonance (<sup>1</sup>H NMR) and carbon nuclear magnetic resonance (<sup>13</sup>C NMR), spectra were recorded using a JEOL ECZ 400S spectrometer at ambient temperature. <sup>1</sup>H NMR chemical shifts are reported in ppm relative to tetramethylsilane (TMS) or the solvent resonance as the internal standard (TMS: 0.00 ppm or CHCl<sub>3</sub>: 7.26 ppm). <sup>13</sup>C NMR chemical shifts are reported in ppm relative to the solvent resonance as the internal standard (CDCl<sub>3</sub>: 77.0 ppm). Data are presented in the following form: chemical shift, multiplicity (s = singlet, d = doublet, t = triplet, q = quartet, quint = quintet, sext = sextet, sept = septet, m = multiplet and/or multiplet resonances, br = broad), coupling constants (Hz), and signal area integration in natural numbers.

Analytical thin-layer chromatography (TLC) was performed on alumina plates (Merck Co., Inc., 1.05554.0001), which were visualized by exposure to ultraviolet light (254 nm) and/or by immersion in a phosphomolybdic acid ethanol solution followed by heating on a hot plate. Organic solutions were concentrated by rotary evaporation at *ca.* 30–400 mmHg. Purification of the products was performed by flash column chromatography on silica gel (Fuji Silysia Chemical LTD., spherical, neutral, CHROMATOREX PSQ 60B) or preparative thin-layer chromatography (PTLC) on silica gel (Merck Co., Inc. Silica gel 60 F254). IR spectra were recorded using a JASCO FT/IR-6700. Characteristic IR absorptions are reported in cm<sup>-1</sup>. High-resolution mass spectra (HRMS) were recorded using the electrospray ionization (ESI) method on a bruker timsTOF mass spectrometer. High performance liquid chromatography (HPLC) was performed on JASCO PU-2080 and UV-2075 instruments using Daicel Chiralpak column (4.6 mm × 250 mm).

## Experimental Procedures

### Optimization of Reaction Conditions: Procedure for the Etherification Reaction of **1a** with **2a** Using Hydrosilane (Table 1 and S1).

A round-bottom flask equipped with a magnetic stir bar was charged with benzyl alcohol **1a** (0.50 mmol) ethanol (**2a**, 2.5 mL), and organosilane (2.0 mmol). The reaction mixture was stirred at 85 °C for 24 h. Then, the resulting mixture was cool to room temperature and concentrated *in vacuo*. The crude residue was purified by flash column chromatography on silica gel to afford the corresponding product **3aa**.

**Table S1.** Optimization studies for organosilane

### General Procedure for the Etherification Reaction of **1** with **2** Using (EtO)<sub>2</sub>MeSiH (Scheme 2–5 and Scheme 7).

A round-bottom flask equipped with a magnetic stir bar was charged with benzyl alcohol **1** (0.50 mmol) alcohol solvent (**2**, 2.5 mL), and (EtO)<sub>2</sub>MeSiH (2.0 mmol). The reaction mixture was stirred at 85–100 °C for 24 h. Then, the resulting mixture was cool to room temperature and concentrated *in vacuo*. The crude residue was purified by flash column chromatography on silica gel to afford the corresponding product **3**.

### The Etherification Reaction using (*S*)-1r (Scheme 6)

A round-bottom flask equipped with a magnetic stir bar was charged with chiral alcohol (*S*)-1j (97%ee, 86.3 mg, 0.50 mmol) ethanol (**2a**, 2.5 mL), and (EtO)<sub>2</sub>MeSiH (268.6 mg, 2.0 mmol). The reaction mixture was stirred at 85 °C for 24 h. Then, the resulting mixture was cool to room temperature and concentrated in vacuo. The crude residue was purified by flash column chromatography on silica gel, eluting hexane/EtOAc (20/1), to afford the corresponding product **3ja** (83.5 mg, 84%, 14% ee).

(a) racemic **1j**

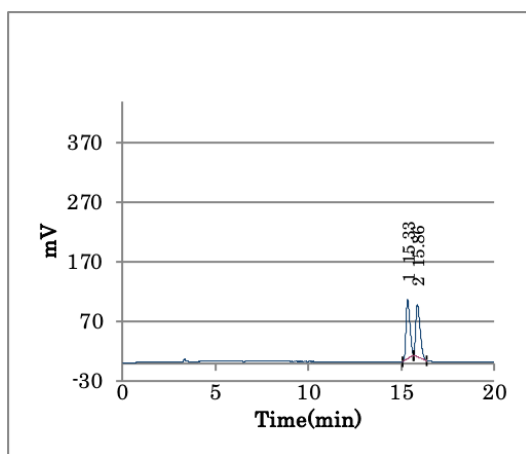

| No. | Rt    | Peak Name | Area    | Area(%) |
|-----|-------|-----------|---------|---------|
| 1   | 15.33 |           | 1427543 | 49.9996 |
| 2   | 15.86 |           | 1427565 | 50.0004 |

(b) enantiomerically enriched (*S*)-1j

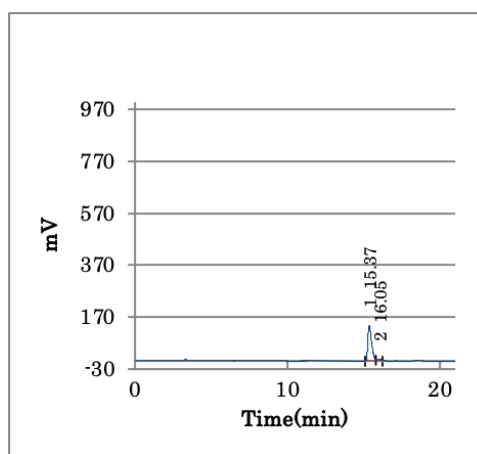

| No. | Rt    | Peak Name | Area    | Area(%) |
|-----|-------|-----------|---------|---------|
| 1   | 15.37 |           | 2244772 | 98.4343 |
| 2   | 16.05 |           | 35705   | 1.5657  |

**Figure S1** Chiral HPLC profiles of (a) racemic and (b) enantiomerically enriched (*S*)-1j using Daicel CHIRALPAK IE-3 (flow rate: 1.1 mL/min, *n*-hexane/ethyl acetate = 95/5 as an eluent monitored at 254 nm).



(a) racemic **3ja**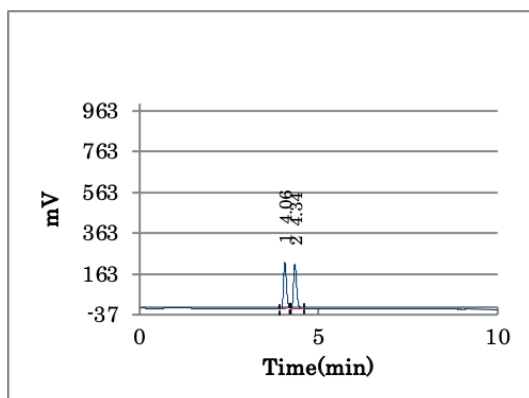

| No. | Rt   | Peak Name | Area    | Area(%) |
|-----|------|-----------|---------|---------|
| 1   | 4.06 |           | 1258115 | 49.1953 |
| 2   | 4.34 |           | 1299272 | 50.8047 |

(b) the product **3ja**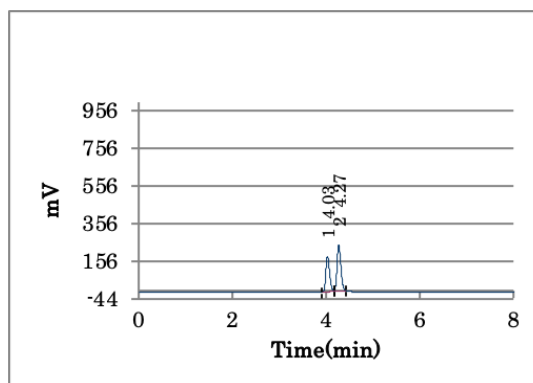

| No. | Rt   | Peak Name | Area    | Area(%) |
|-----|------|-----------|---------|---------|
| 1   | 4.03 |           | 1046526 | 42.9947 |
| 2   | 4.27 |           | 1387553 | 57.0053 |

**Figure S2** Chiral HPLC profiles of (a) racemic and (b) the product **3ja** using Daicel CHIRALPAK IC-3 (flow rate: 1.1 mL/min, *n*-hexane/ ethyl acetate = 99/1 as an eluent monitored at 254 nm).

### Characterization Data of the Isolated Products

#### Synthesis of 1-(1-ethoxyethyl)-4-methylbenzene (**3aa**)

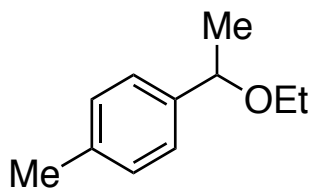

Compound **3aa** was prepared according to the general procedure using

**1a** (68.8 mg, 0.51 mmol), and (EtO)<sub>2</sub>MeSiH (269.9 mg, 2.01 mmol) in ethanol (**2a**, 2.5 mL) at 85 °C for 24 h. Product **3aa** was obtained in 95% yield (78.8 mg, 0.48 mmol) as a colorless oil.

<sup>1</sup>H NMR (400 MHz, CDCl<sub>3</sub>) δ 1.17 (t, *J* = 7.2 Hz, 3H), 1.42 (d, *J* = 6.8 Hz, 3H), 2.34 (s, 3H), 3.34 (q, *J* = 7.2 Hz, 2H), 4.37 (q, *J* = 6.8 Hz, 1H), 7.14–7.16 (m, 2H), 7.20–7.22 (m, 2H) ppm; <sup>13</sup>C NMR (100 MHz, CDCl<sub>3</sub>) δ 15.4, 21.1, 24.3, 63.8, 77.5, 126.1, 129.0, 136.9, 141.2 ppm. <sup>1</sup>H and <sup>13</sup>C NMR spectra have been attached. The product was characterized by comparison with previously reported <sup>1</sup>H and <sup>13</sup>C NMR data.<sup>4</sup>

### Synthesis of 1-(1-ethoxyethyl)-4-methoxybenzene (**3ba**)

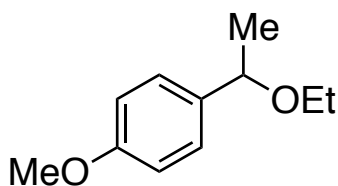

Compound **3ba** was prepared according to the general procedure using **1b** (76.8 mg, 0.50 mmol), and (EtO)<sub>2</sub>MeSiH (268.8 mg, 2.00 mmol) in ethanol (**2a**, 2.5 mL) at 85 °C for 24 h. Product **3ba** was obtained in 94% yield (85.1 mg, 0.47 mmol) as a colorless oil.

<sup>1</sup>H NMR (400 MHz, CDCl<sub>3</sub>) δ 1.17 (t, *J* = 7.2 Hz, 3H), 1.42 (d, *J* = 6.8 Hz, 3H), 3.33 (q, *J* = 7.2 Hz, 2H), 3.81 (s, 3H), 4.36 (q, *J* = 6.4 Hz, 1H), 6.86–6.90 (m, 2H), 7.22–7.26 (m, 2H) ppm; <sup>13</sup>C NMR (100 MHz, CDCl<sub>3</sub>) δ 15.4, 24.2, 55.2, 63.6, 77.2, 113.7, 127.3, 136.2, 158.8 ppm. <sup>1</sup>H and <sup>13</sup>C NMR spectra have been attached. The product was characterized by comparison with previously reported <sup>1</sup>H and <sup>13</sup>C NMR data.<sup>5</sup>

### Synthesis of 1-(1-ethoxyethyl)-4-diethylaminobenzene (**3ca**)

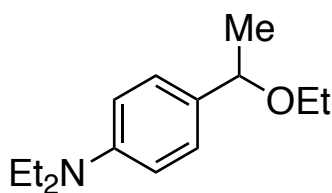

Compound **3ca** was prepared according to the general procedure using **1c** (96.7 mg, 0.50 mmol), and (EtO)<sub>2</sub>MeSiH (269.8 mg, 2.0 mmol) in ethanol (**2a**, 2.5 mL) at 85 °C for 24 h. Product **3ca** was obtained in 84% yield (93.1 mg, 0.42 mmol) as a colorless oil.

<sup>1</sup>H NMR (400 MHz, CDCl<sub>3</sub>, 60 °C) δ 1.15 (t, *J* = 6.8 Hz, 9H), 1.41 (d, *J* = 6.4 Hz, 3H), 3.30–3.38 (m, 6H), 4.30 (q, *J* = 6.4 Hz, 1H), 6.64–6.66 (m, 2H), 7.12–7.14 (m, 2H) ppm; <sup>13</sup>C NMR (100 MHz, CDCl<sub>3</sub>, 60 °C) δ 12.7, 15.4, 23.8, 44.5, 63.4, 77.4, 112.1, 127.4, 131.2, 147.6 ppm. IR (Diamond-ATR, neat) 2970, 2928, 2868, 1739, 1613, 1519, 1372, 1353, 1262, 1198, 1189, 1093, 1011, 940, 813 cm<sup>-1</sup>; HRMS (APCI): calcd for C<sub>14</sub>H<sub>24</sub>N<sub>1</sub>O<sub>1</sub> [M+H]<sup>+</sup>: 222.1852. found: 222.1853. <sup>1</sup>H and <sup>13</sup>C NMR spectra have been attached.

### Synthesis of 1-(1-ethoxyethyl)-4-methylthiobenzene (**3da**)

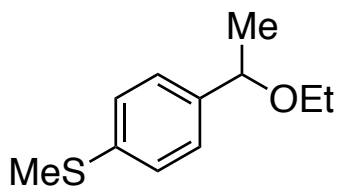

Compound **3da** was prepared according to the general procedure using **1d** (84.2 mg, 0.50 mmol), and (EtO)<sub>2</sub>MeSiH (271.0 mg, 2.0 mmol) in ethanol (**2a**, 2.5 mL) at 85 °C

for 24 h. Product **3da** was obtained in 99% yield (96.8 mg, 0.49 mmol) as a colorless oil.

$^1\text{H}$  NMR (400 MHz,  $\text{CDCl}_3$ )  $\delta$  1.18 (t,  $J = 7.2$  Hz, 3H), 1.42 (d,  $J = 6.4$  Hz, 3H), 2.49 (s, 3H), 3.34 (q,  $J = 7.2$  Hz, 2H), 4.37 (q,  $J = 6.8$  Hz, 1H), 7.24 (s, 4H) ppm;  $^{13}\text{C}$  NMR (100 MHz,  $\text{CDCl}_3$ )  $\delta$  15.3, 15.9, 24.1, 63.8, 77.2, 126.59, 126.62, 137.1, 141.1 ppm. IR (Diamond-ATR, neat) 2972, 2925, 2865, 1738, 1599, 1489, 1439, 1368, 1216, 1209, 1095, 1007, 941, 818, 557  $\text{cm}^{-1}$ ; HRMS (ESI): calcd for  $\text{C}_{11}\text{H}_{16}\text{NaOS}$   $[\text{M}+\text{Na}]^+$ : 219.0814. found: 219.0816.  $^1\text{H}$  and  $^{13}\text{C}$  NMR spectra have been attached.

#### Synthesis of 1-(1-ethoxyethyl)-3,4,5-trimethoxybenzene (**3ha**)

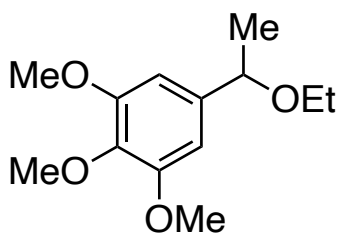

Compound **3ha** was prepared according to the general procedure using **1h** (106.8 mg, 0.50 mmol), and  $(\text{EtO})_2\text{MeSiH}$  (269.9 mg, 2.0 mmol) in ethanol (**2a**, 2.5 mL) at 85 °C for 24 h. Product **3ha** was obtained in 93% yield (112.1 mg, 0.47 mmol) as a colorless oil.

$^1\text{H}$  NMR (400 MHz,  $\text{CDCl}_3$ )  $\delta$  1.21 (t,  $J = 7.2$  Hz, 3H), 1.43 (d,  $J = 6.4$  Hz, 3H), 3.34–3.42 (m, 2H), 3.84 (s, 3H), 3.87 (s, 6H), 4.33 (q,  $J = 6.4$  Hz, 1H), 6.54 (s, 2H) ppm;  $^{13}\text{C}$  NMR (100 MHz,  $\text{CDCl}_3$ )  $\delta$  15.3, 24.2, 55.9, 60.6, 63.8, 77.8, 102.5, 136.7, 140.0, 153.1 ppm. IR (Diamond-ATR, neat) 2972, 2932, 2870, 2839, 1590, 1507, 1457, 1418, 1339, 1326, 1231, 1122, 1100, 1008, 909, 837, 776, 690, 662, 611, 526  $\text{cm}^{-1}$ ; HRMS (ESI): calcd for  $\text{C}_{13}\text{H}_{20}\text{Na}_1\text{O}_4$   $[\text{M}+\text{Na}]^+$ : 263.1254. found: 263.1256.  $^1\text{H}$  and  $^{13}\text{C}$  NMR spectra have been attached.

#### Synthesis of 1-(1-ethoxyethyl)-2,4,6-trimethylbenzene (**3ia**)

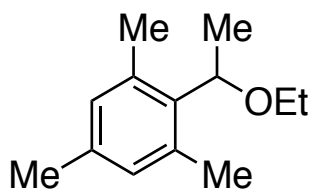

Compound **3ia** was prepared according to the general procedure using **1i** (83.0 mg, 0.51 mmol), and  $(\text{EtO})_2\text{MeSiH}$  (269.2 mg, 2.0 mmol) in ethanol (**2a**, 2.5 mL) at 85 °C for 24 h. Product **3ia** was obtained in 94% yield (91.2 mg, 0.47 mmol) as a colorless oil.

$^1\text{H}$  NMR (400 MHz,  $\text{CDCl}_3$ )  $\delta$  1.18 (t,  $J = 6.8$  Hz, 3H), 1.47 (d,  $J = 6.8$  Hz, 3H), 2.25 (s, 3H), 2.37 (s, 6H), 3.25–3.31 (m, 2H), 4.90 (q,  $J = 6.8$  Hz, 1H), 6.81 (s, 2H) ppm;  $^{13}\text{C}$  NMR (100 MHz,  $\text{CDCl}_3$ )  $\delta$  15.4, 20.3, 20.5, 20.7, 63.5, 74.2, 129.9, 135.6, 136.0, 136.1 ppm. IR (Diamond-ATR, neat) 2972, 2928, 2868, 1735, 1611, 1447, 1368, 1211, 1100, 850, 720, 582  $\text{cm}^{-1}$ ; HRMS (ESI): calcd for  $\text{C}_{13}\text{H}_{20}\text{Na}_1\text{O}_1$   $[\text{M}+\text{Na}]^+$ : 215.1406. found: 215.1398.  $^1\text{H}$  and  $^{13}\text{C}$  NMR spectra have been attached.

### Synthesis of 1-(1-ethoxyethyl)-naphthalene (**3ja**)

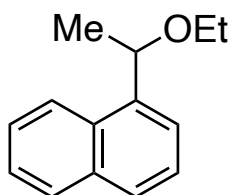

Compound **3ja** was prepared according to the general procedure using **1j** (86.7 mg, 0.50 mmol), and (EtO)<sub>2</sub>MeSiH (269.8 mg, 0.20 mmol) in ethanol (**2a**, 2.5 mL) at 85 °C for 24 h. Product **3ja** was obtained in 71% yield (72.1 mg, 0.36 mmol) as a colorless oil.

<sup>1</sup>H NMR (400 MHz, CDCl<sub>3</sub>) δ 1.23 (t, *J* = 7.2 Hz, 3H), 1.61 (t, *J* = 6.8 Hz, 3H), 3.44 (q, *J* = 7.2 Hz, 2H), 5.16 (t, *J* = 6.4 Hz, 2H), 7.45–7.53 (m, 3H), 7.57–7.59 (m, 1H), 7.76–7.78 (m, 1H), 7.86–7.89 (m, 1H), 8.18–8.20 (m, 1H) ppm; <sup>13</sup>C NMR (100 MHz, CDCl<sub>3</sub>) δ 15.5, 23.6, 64.1, 75.4, 123.2, 123.3, 125.4, 125.5, 125.7, 127.6, 128.8, 130.8, 133.9, 139.7 ppm. IR (Diamond-ATR, neat) 3048, 2973, 2928, 2867, 1596, 1509, 1442, 1369, 1174, 1107, 1080, 798, 775, 625, 615, 474, 417 cm<sup>-1</sup>; HRMS (ESI): calcd for C<sub>14</sub>H<sub>16</sub>Na<sub>1</sub>O<sub>1</sub> [M+Na]<sup>+</sup>: 223.1093. found: 223.1094. <sup>1</sup>H and <sup>13</sup>C NMR spectra have been attached.

### Synthesis of 2-(1-ethoxyethyl)-naphthalene (**3ka**)

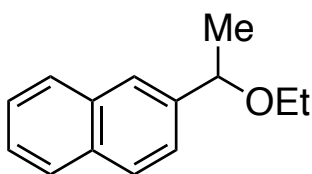

Compound **3ka** was prepared according to the general procedure using **1k** (86.8mg, 0.50 mmol), and (EtO)<sub>2</sub>MeSiH (269.1 mg, 2.0 mmol) in ethanol (**2a**, 2.5 mL) at 85 °C for 24 h. Product **3ka** was obtained in 80% yield (80.3 mg, 0.40 mmol) as a colorless oil.

<sup>1</sup>H NMR (400 MHz, CDCl<sub>3</sub>) δ 1.21 (t, *J* = 6.8 Hz, 3H), 1.52 (d, *J* = 6.8 Hz, 3H), 3.34–3.44 (m, 2H), 4.57 (q, *J* = 6.4 Hz, 1H), 7.43–7.50 (m, 3H), 7.73 (s, 1H), 7.81–7.85 (m, 3H) ppm; <sup>13</sup>C NMR (100 MHz, CDCl<sub>3</sub>) δ 15.4, 24.2, 64.0, 77.9, 124.2, 124.9, 125.6, 126.0, 127.7, 127.8, 128.3, 133.0, 133.3, 141.6 ppm. IR (Diamond-ATR, neat) 3055, 2972, 2927, 2865, 1738, 1508, 1455, 1441, 1369, 1309, 1217, 1097, 856, 819, 745, 478 cm<sup>-1</sup>; HRMS (ESI): calcd for C<sub>14</sub>H<sub>16</sub>Na<sub>1</sub>O<sub>1</sub> [M+Na]<sup>+</sup>: 223.1093. found: 223.1093. <sup>1</sup>H and <sup>13</sup>C NMR spectra have been attached.

### Synthesis of 1-ethoxy-2,3-dihydro-1*H*-indene (**3la**)

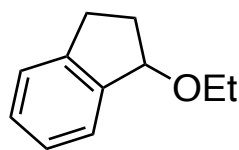

Compound **3la** was prepared according to the general procedure using **1l** (68.1 mg, 0.51 mmol), and (EtO)<sub>2</sub>MeSiH (268.9 mg, 2.00 mmol) in ethanol (**2a**, 2.5 mL) at 85 °C for 24 h.

Product **3la** was obtained in 77% yield (63.8 mg, 0.39 mmol) as a colorless oil.

$^1\text{H}$  NMR (400 MHz,  $\text{CDCl}_3$ )  $\delta$  1.24 (t,  $J = 7.2$  Hz, 3H), 2.03–2.11 (m, 1H), 2.31–2.39 (m, 1H), 2.77–2.84 (m, 1H), 3.04–3.12 (m, 1H), 3.58–3.64 (m, 2H), 4.92 (dd,  $J = 6.8$  and 4.4 Hz, 1H), 7.18–7.26 (m, 3H), 7.39–7.40 (m, 1H) ppm;  $^{13}\text{C}$  NMR (100 MHz,  $\text{CDCl}_3$ )  $\delta$  15.6, 30.2, 32.5, 63.9, 83.0, 124.8, 125.0, 126.2, 128.2, 143.0, 143.9 ppm. IR (Diamond-ATR, neat) 3070, 3025, 2972, 2929, 2866, 1478, 1459, 1335, 1112, 1080, 1019, 970, 744, 601  $\text{cm}^{-1}$ ; HRMS (ESI): calcd for  $\text{C}_{11}\text{H}_{14}\text{Na}_1\text{O}_1$   $[\text{M}+\text{Na}]^+$ : 185.0937. found: 186.0932.  $^1\text{H}$  and  $^{13}\text{C}$  NMR spectra have been attached.

### Synthesis of 4-ethoxy-3,4-dihydro-2H-1-benzopyran (**3ma**)

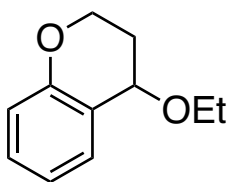

Compound **3ma** was prepared according to the general procedure using **1m**

(75.9 mg, 0.51 mmol), and  $(\text{EtO})_2\text{MeSiH}$  (268.8 mg, 2.0 mmol) in ethanol (**2a**, 2.5 mL) at 85 °C for 24 h. Product **3ma** was obtained in 93% yield (84.2 mg, 0.47 mmol) as a colorless oil.

$^1\text{H}$  NMR (400 MHz,  $\text{CDCl}_3$ )  $\delta$  1.25 (t,  $J = 7.2$  Hz, 3H), 2.00–2.16 (m, 2H), 3.57–3.70 (m, 2H), 4.22–4.34 (m, 2H), 4.37–4.39 (m, 1H), 6.82–6.84 (m, 1H), 6.87–6.91 (m, 1H), 7.17–7.21 (m, 1H), 7.24–7.26 (m, 1H) ppm;  $^{13}\text{C}$  NMR (100 MHz,  $\text{CDCl}_3$ )  $\delta$  15.6, 27.7, 62.2, 63.5, 70.1, 116.9, 119.9, 122.1, 129.5, 130.5, 154.8 ppm. IR (Diamond-ATR, neat) 2972, 2927, 2869, 1609, 1583, 1488, 1454, 1268, 1253, 1223, 1091, 1073, 1061, 1015, 752, 601  $\text{cm}^{-1}$ ; HRMS (ESI): calcd for  $\text{C}_{11}\text{H}_{14}\text{Na}_1\text{O}_2$   $[\text{M}+\text{Na}]^+$ : 201.0886. found: 201.0885.  $^1\text{H}$  and  $^{13}\text{C}$  NMR spectra have been attached.

### Synthesis of 2-(1-ethoxyethyl)-thiophene (**3na**)

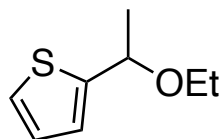

Compound **3na** was prepared according to the general procedure using **1n** (64.6

mg, 0.50 mmol), and  $(\text{EtO})_2\text{MeSiH}$  (270.3 mg, 2.0 mmol) in ethanol (**2a**, 2.5 mL) at 85 °C for 24 h. Product **3na** was obtained in 65% yield (51.5 mg, 0.33 mmol) as a colorless oil.

$^1\text{H}$  NMR (400 MHz,  $\text{CDCl}_3$ )  $\delta$  1.19 (t,  $J = 6.8$  Hz, 3H), 1.55 (d,  $J = 6.4$  Hz, 3H), 3.39–3.48 (m, 2H), 4.69 (q,  $J = 6.8$  Hz, 1H), 6.95–6.97 (m, 2H), 7.24–7.25 (m, 2H) ppm;  $^{13}\text{C}$  NMR (100 MHz,  $\text{CDCl}_3$ )  $\delta$  15.3, 24.3, 63.8, 73.1, 124.1, 124.4, 126.3, 148.2 ppm. IR (Diamond-ATR, neat) 2975, 2929, 2867, 2161, 1443, 1370, 1310, 1260, 1077, 906, 853, 804, 755, 696  $\text{cm}^{-1}$ ; HRMS (ESI): calcd for  $\text{C}_8\text{H}_{12}\text{Na}_1\text{O}_1\text{S}_1$   $[\text{M}+\text{Na}]^+$ : 179.0501. found: 179.0502.  $^1\text{H}$  and  $^{13}\text{C}$  NMR spectra have been attached.

### Synthesis of (ethoxymethylene)dibenzene (**3oa**)

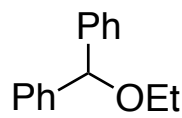

Compound **3oa** was prepared according to the general procedure using **1o** (92.4 mg, 0.50 mmol), and (EtO)<sub>2</sub>MeSiH (269.8 mg, 2.0 mmol) in ethanol (**2a**, 2.5 mL) at 85 °C for 24 h. Product **3oa** was obtained in 82% yield (87.1 mg, 0.41 mmol) as a colorless oil.

<sup>1</sup>H NMR (400 MHz, CDCl<sub>3</sub>) δ 1.27 (t, *J* = 7.2 Hz, 3H), 3.52 (q, *J* = 7.2 Hz, 2H), 5.36 (s, 1H), 7.21–7.26 (m, 2H), 7.29–7.37 (m, 8H) ppm; <sup>13</sup>C NMR (100 MHz, CDCl<sub>3</sub>) δ 15.3, 64.5, 83.5, 126.9, 127.3, 128.3, 142.5 ppm. <sup>1</sup>H and <sup>13</sup>C NMR spectra have been attached. The product was characterized by comparison with previously reported <sup>1</sup>H and <sup>13</sup>C NMR data.<sup>4</sup>

### Synthesis of {4-[1-(Ethoxy)ethyl]phenyl}methanol (**3sa**)

Compound **3sa** was prepared according to the general procedure using **1s** (77.8 mg, 0.51 mmol), and (EtO)<sub>2</sub>MeSiH (269.2 mg, 2.0 mmol) in ethanol (**2a**, 2.5 mL) at 85 °C for 24 h. Product **3sa** was obtained in 74% yield (68.2 mg, 0.38 mmol) as a colorless oil.

<sup>1</sup>H NMR (400 MHz, CDCl<sub>3</sub>) δ 1.19 (t, *J* = 6.4 Hz, 3H), 1.43 (d, *J* = 6.4 Hz, 3H), 1.65 (br, 1H), 3.35 (q, *J* = 6.8 Hz, 2H), 4.41 (q, *J* = 6.4 Hz, 1H), 4.69 (d, *J* = 5.6 Hz, 2H), 7.31–7.37 (m, 4H) ppm; <sup>13</sup>C NMR (100 MHz, CDCl<sub>3</sub>) δ 15.3, 24.2, 63.9, 65.1, 77.5, 126.3, 127.1, 139.9, 143.7 ppm. IR (Diamond-ATR, neat) 3376, 2974, 2928, 2867, 1444, 1420, 1397, 1369, 1211, 1095, 1064, 1007, 939, 845, 817, 719, 607, 554 cm<sup>-1</sup>; HRMS (ESI): calcd for C<sub>11</sub>H<sub>16</sub>Na<sub>1</sub>O<sub>2</sub> [M+Na]<sup>+</sup>: 203.1043. found: 203.1043. <sup>1</sup>H and <sup>13</sup>C NMR spectra have been attached.

### Synthesis of [(*IE*)-3-ethoxybut-1-en-1-yl]benzene (**3ta**)

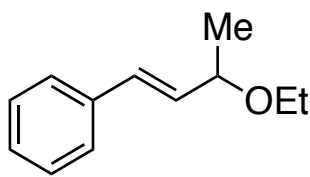

Compound **3ta** was prepared according to the general procedure using **1t** (75.3 mg, 0.51 mmol), and (EtO)<sub>2</sub>MeSiH (268.8 mg, 2.0 mmol) in ethanol (**2a**, 2.5 mL) at 85 °C for 24 h. Product **3ta** was obtained in 90% yield (80.6 mg, 0.46 mmol) as a colorless oil.

<sup>1</sup>H NMR (400 MHz, CDCl<sub>3</sub>) δ 1.21 (t, *J* = 6.8 Hz, 3H), 1.34 (d, *J* = 6.4 Hz, 3H), 3.38–3.45 (m, 1H), 3.53–3.61 (m, 1H), 3.97–4.04 (m, 1H), 6.12 (dd, *J* = 16.0 and 7.6 Hz, 1H), 6.51 (d, *J* = 16.0 Hz, 1H), 7.22–7.26 (m, 1H), 7.30–7.34 (s, 2H), 7.38–7.41 (m, 2H) ppm; <sup>13</sup>C NMR (100 MHz, CDCl<sub>3</sub>) δ 15.4, 21.8, 63.6, 76.3, 126.4, 127.5, 128.5, 130.8, 132.1, 136.7 ppm. <sup>1</sup>H and <sup>13</sup>C NMR spectra have been attached. The product was characterized by comparison with previously reported <sup>1</sup>H and <sup>13</sup>C NMR data.<sup>6</sup>

Compound **3ta** was prepared according to the general procedure using **1u** (74.6 mg, 0.50 mmol), and (EtO)<sub>2</sub>MeSiH (268.7 mg, 2.0 mmol) in ethanol (**2a**, 2.5 mL) at 85 °C for 24 h. Product **3ta** was obtained in 96% yield (84.2 mg, 0.48 mmol) as a colorless oil.

#### Synthesis of 1-(1-methoxyethyl)-4-methylbenzene (**3ab**)

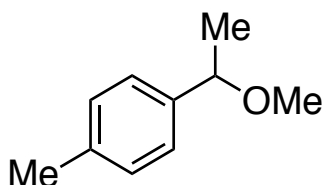

Compound **3ab** was prepared according to the general procedure using **1a** (68.0 mg, 0.50 mmol), and (EtO)<sub>2</sub>MeSiH (269.4 mg, 2.0 mmol) in methanol (**2b**, 2.5 mL) at 85 °C for 24 h. Product **3ab** was obtained in 78% yield (58.5 mg, 0.39 mmol) as a colorless oil.

<sup>1</sup>H NMR (400 MHz, CDCl<sub>3</sub>) δ 1.42 (d, *J* = 6.4 Hz, 3H), 2.35 (s, 3H), 3.21 (s, 3H), 4.26 (q, *J* = 6.4 Hz, 1H), 7.15–7.17 (m, 2H), 7.19–7.21 (m, 2H) ppm; <sup>13</sup>C NMR (100 MHz, CDCl<sub>3</sub>) δ 21.1, 23.9, 56.3, 79.4, 126.1, 129.1, 137.1, 140.4 ppm. IR (Diamond-ATR, neat) 2976, 2927, 2819, 1738, 1514, 1448, 1370, 1219, 1210, 1106, 1085, 865, 816, 554 cm<sup>-1</sup>; HRMS (APCI): calcd for C<sub>10</sub>H<sub>15</sub>O [M+Na]<sup>+</sup>: 151.1117. found: 151.1117. <sup>1</sup>H and <sup>13</sup>C NMR spectra have been attached.

#### Synthesis of 1-(1-methoxyethyl)-4-methylbenzene-d<sub>3</sub> (**3ab'**)

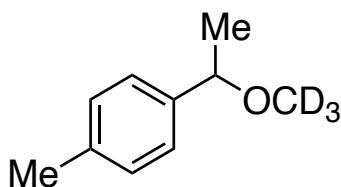

Compound **3ab'** was prepared according to the general procedure using **1a** (69.3 mg, 0.51 mmol), and (EtO)<sub>2</sub>MeSiH (269.0 mg, 2.0 mmol) in methanol-d<sub>4</sub> (**2b'**, 2.5 mL) at 85 °C for 24 h. Product **3ab'** was obtained in 77% yield (60.1 mg, 0.39 mmol) as a colorless oil.

<sup>1</sup>H NMR (400 MHz, CDCl<sub>3</sub>) δ 1.42 (d, *J* = 6.4 Hz, 3H), 2.35 (s, 3H), 4.26 (q, *J* = 6.4 Hz, 1H), 7.15–7.17 (m, 2H), 7.19–7.21 (m, 2H) ppm; <sup>13</sup>C NMR (100 MHz, CDCl<sub>3</sub>) δ 21.1, 23.9, 55.4 (quin, *J* = 22.1 Hz), 79.3, 126.1, 129.1, 137.0, 140.4 ppm. IR (Diamond-ATR, neat) 2975, 2927, 2861, 2234, 2192, 2057, 1514, 1452, 1370, 1302, 1279, 1205, 1120, 1103, 1039, 816, 722, 548 cm<sup>-1</sup>; HRMS (ESI): calcd for C<sub>10</sub>H<sub>11</sub>D<sub>3</sub>Na<sub>1</sub>O<sub>1</sub> [M+Na]<sup>+</sup>: 176.1125. found: 176.1120. <sup>1</sup>H and <sup>13</sup>C NMR spectra have been attached.

#### Synthesis of 1-[(But-3-en-1-yloxy)ethyl]-4-methylbenzene (**3ac**)

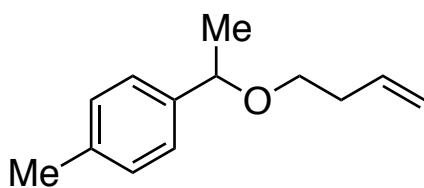

Compound **3ac** was prepared according to the general procedure using **1a** (68.5 mg, 0.50 mmol), and (EtO)<sub>2</sub>MeSiH (268.9 mg, 2.0 mmol) in 3-buten-1-ol (**2c**, 2.5 mL) at 85 °C for 24 h. Product **3ac** was obtained in 92% yield (88.1 mg, 0.46 mmol) as a colorless oil.

<sup>1</sup>H NMR (400 MHz, CDCl<sub>3</sub>) δ 1.42 (d, *J* = 6.4 Hz, 3H), 2.29–2.34 (m, 5H), 3.29–3.38 (m, 2H), 4.37 (q, *J* = 6.4 Hz, 1H), 4.99–5.08 (m, 2H), 5.74–5.85 (m, 1H), 7.14–7.16 (m, 2H), 7.19–7.22 (m, 2H) ppm; <sup>13</sup>C NMR (100 MHz, CDCl<sub>3</sub>) δ 21.1, 24.2, 34.3, 67.8, 77.8, 116.1, 126.1, 129.0, 135.3, 136.9, 141.0 ppm. IR (Diamond-ATR, neat) 2976, 2927, 2858, 1738, 1642, 1514, 1443, 1368, 1204, 1097, 995, 911, 816, 722, 640, 552 cm<sup>-1</sup>; HRMS (APCI): calcd for C<sub>13</sub>H<sub>19</sub>O [M+H]<sup>+</sup>: 191.1430. found: 191.1429. <sup>1</sup>H and <sup>13</sup>C NMR spectra have been attached.

#### Synthesis of 1-methyl-4-[1-(prop-2-yn-1-yloxy)ethyl]benzene (**3ad**)

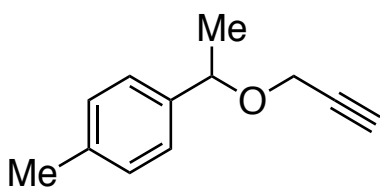

Compound **3ad** was prepared according to the general procedure using **1a** (69.1 mg, 0.51 mmol), and (EtO)<sub>2</sub>MeSiH (268.7 mg, 2.00 mmol) in 2-propyn-1-ol (**2d**, 2.5 mL) at 85 °C for 24 h. Product **3ad** was obtained in 97% yield (85.7 mg, 0.49 mmol) as a colorless oil.

<sup>1</sup>H NMR (400 MHz, CDCl<sub>3</sub>) δ 1.47 (d, *J* = 6.4 Hz, 3H), 2.35 (s, 3H), 2.40 (t, *J* = 2.0 Hz, 1H), 3.86 (dd, *J* = 15.6 and 2.4 Hz, 1H), 4.07 (dd, *J* = 15.6 and 2.4 Hz, 1H), 4.62 (q, *J* = 6.4 Hz, 1H), 7.15–7.18 (m, 2H), 7.21–7.23 (m, 2H) ppm; <sup>13</sup>C NMR (100 MHz, CDCl<sub>3</sub>) δ 21.1, 23.7, 55.3, 73.9, 76.4, 80.0, 126.4, 129.2, 137.5, 139.3 ppm. <sup>1</sup>H and <sup>13</sup>C NMR spectra have been attached. The product was characterized by comparison with previously reported <sup>1</sup>H and <sup>13</sup>C NMR data.<sup>4</sup>



### Synthesis of 1-methyl-4-[(1-methylethoxy)ethyl]benzene (**3ae**)

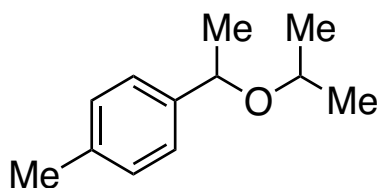

Compound **3ae** was prepared according to the general procedure

using **1a** (68.5 mg, 0.50 mmol), and (EtO)<sub>2</sub>MeSiH (269.4 mg, 2.0 mmol) in 2-propanol (**2e**, 2.5 mL) at 100 °C for 24 h. Product **3ae** was obtained in 22% yield (19.7 mg, 0.11 mmol) as a colorless oil.

<sup>1</sup>H NMR (400 MHz, CDCl<sub>3</sub>) δ 1.09 (d, *J* = 6.4 Hz, 3H), 1.14 (d, *J* = 6.4 Hz, 3H), 1.39 (d, *J* = 6.4 Hz, 3H), 2.34 (s, 3H), 3.43–3.52 (m, 1H), 4.50 (q, *J* = 6.4 Hz, 1H), 7.14–7.17 (m, 2H), 7.21–7.23 (m, 2H) ppm; <sup>13</sup>C NMR (100 MHz, CDCl<sub>3</sub>) δ 21.1, 21.3, 23.3, 24.8, 68.3, 74.3, 126.0, 129.0, 136.7, 141.8 ppm. IR (Diamond-ATR, neat) 2971, 2928, 2871, 1738, 1513, 1450, 1373, 1206, 1088, 1022, 971, 816, 553 cm<sup>-1</sup>; HRMS (APCI): calcd for C<sub>12</sub>H<sub>19</sub>O [M+H]<sup>+</sup>: 179.1430. found:179.1430. <sup>1</sup>H and <sup>13</sup>C NMR spectra have been attached.

### Synthesis of 1-[1-ethoxy-2-(4-methylphenoxy)ethyl]-4-methoxybenzene (**3va**)

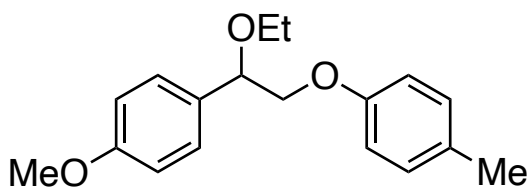

Compound **3va** was prepared according to the

general procedure using **1v** (129.3 mg, 0.50 mmol), and (EtO)<sub>2</sub>MeSiH (269.0 mg, 2.0 mmol) in ethanol (**2a**, 2.5 mL) at 85 °C for 24 h. Product **3va** was obtained in 88% yield (125.6 mg, 0.44 mmol) as a colorless oil.

<sup>1</sup>H NMR (400 MHz, CDCl<sub>3</sub>) δ 1.21 (d, *J* = 6.4 Hz, 3H), 2.27 (s, 3H), 3.45–3.50 (m, 2H), 3.82 (s, 3H), 3.94 (dd, *J* = 4.4 and 10 Hz, 1H), 4.14 (d, *J* = 8.0 and 10 Hz, 1H), 4.60–4.63 (m, 1H), 6.77–6.81 (m, 2H), 6.89–6.93 (m, 2H), 7.04–7.06 (m, 2H), 7.30–7.33 (m, 2H) ppm; <sup>13</sup>C NMR (100 MHz, CDCl<sub>3</sub>) δ 15.3, 20.4, 55.2, 64.4, 72.5, 79.8, 113.8, 114.7, 128.1, 129.8, 130.0, 131.4, 156.7, 159.4 ppm. IR (Diamond-ATR, neat) 3031, 2973, 2926, 2868, 2836, 1611, 1508, 1454, 1301, 1292, 1238, 1173, 1099, 1033, 814, 586, 510 cm<sup>-1</sup>; HRMS (ESI): calcd for C<sub>18</sub>H<sub>22</sub>Na<sub>1</sub>O<sub>3</sub> [M+Na]<sup>+</sup>: 309.1461. found: 309.1461. <sup>1</sup>H and <sup>13</sup>C NMR spectra have been attached.

## Reference

- [1] B. D. Stevens, C. J. Bungard, S. G. Nelson, *J. Org. Chem.* **2006**, *71*, 6397–6402.
- [2] (a) H. Nishiyama, H. Sakaguchi, T. Nakamura, M. Horihata, K. Itoh, *Organometallics*, **1989**, *8*, 846–848. (b) H. Nishiyama, M. Kondo, T. Nakamura, K. Itoh, *Organometallics*, **1991**, *10*, 500–508.
- [3] K. Chen, J. Schwarz, T. A. Karl, A. Chatterjee, B. König, *Chem. Commun.* **2019**, *55*, 13144–11347.
- [4] L. Zhang, A. Gonzalez-de-Castro, C. Chen, F. Li, S. Xi, L. Xu, J. Xiao, *Molecular Catalysis*, **2017**, *433*, 62-67.
- [5] J. Kim, D.-H. Lee, N. Kalutharage, C. S. Yi, *ACS Catal.* **2014**, *4*, 3881–3885.
- [6] L. Ouyang, Y. Xia, R. Miao, J. Liao, R. Luo, *Org. Biomol. Chem.*, **2022**, *20*, 2621–2625.

# $^1\text{H}$ NMR and $^{13}\text{C}$ NMR Spectra

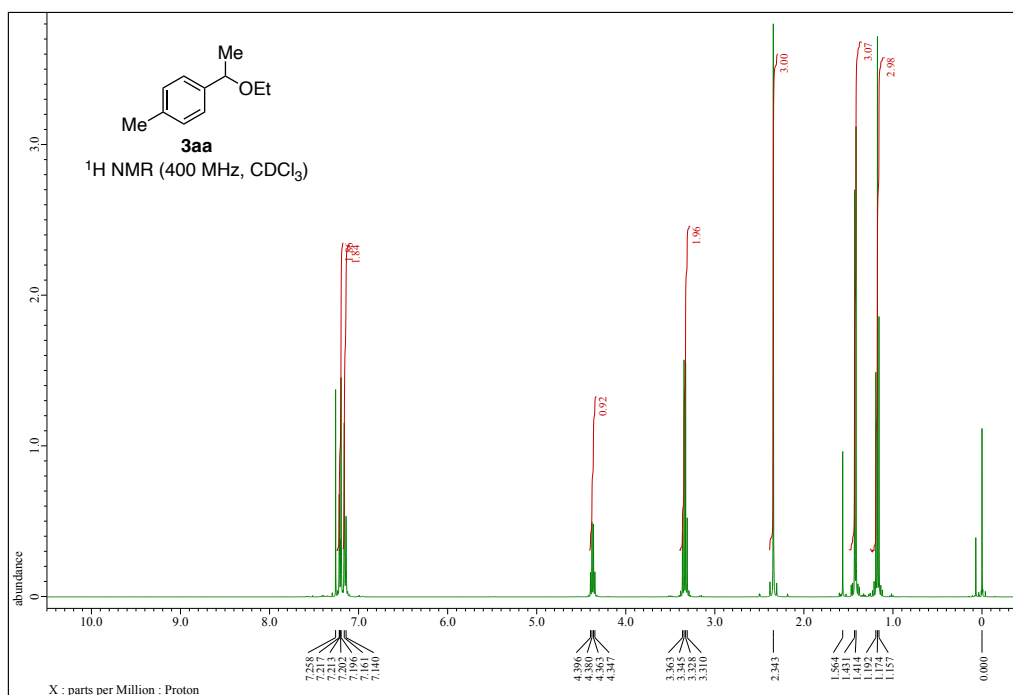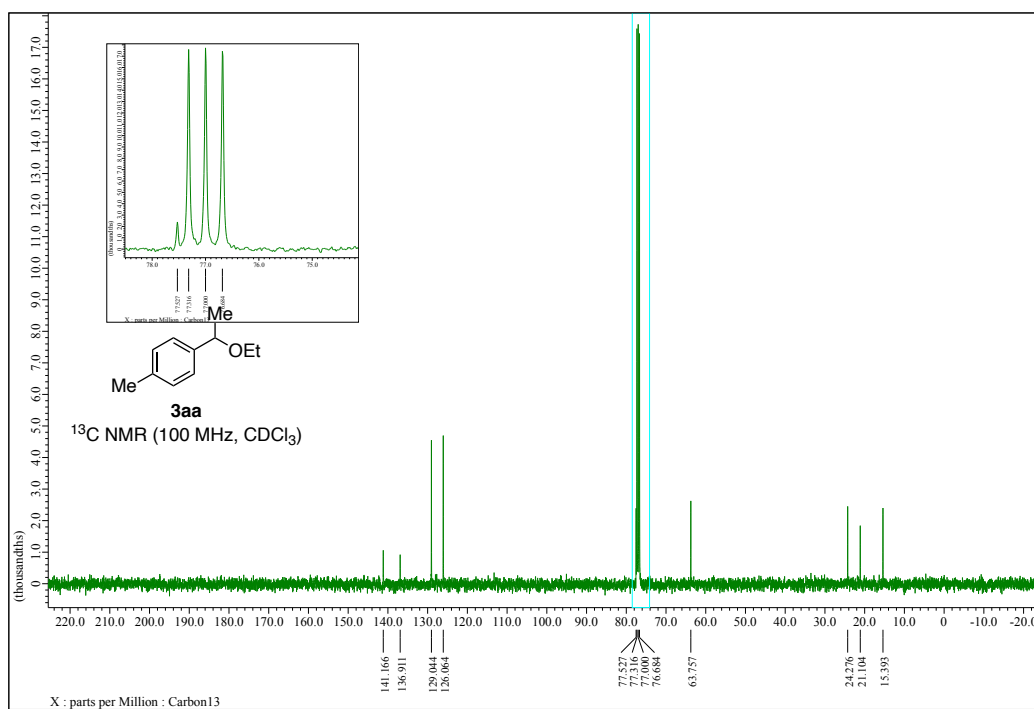

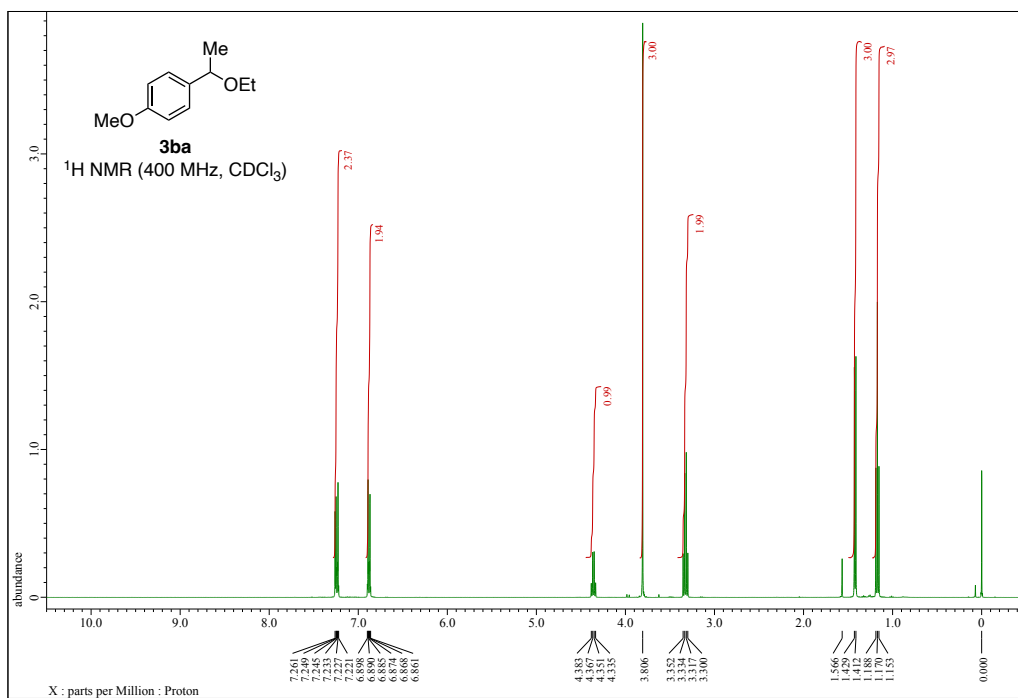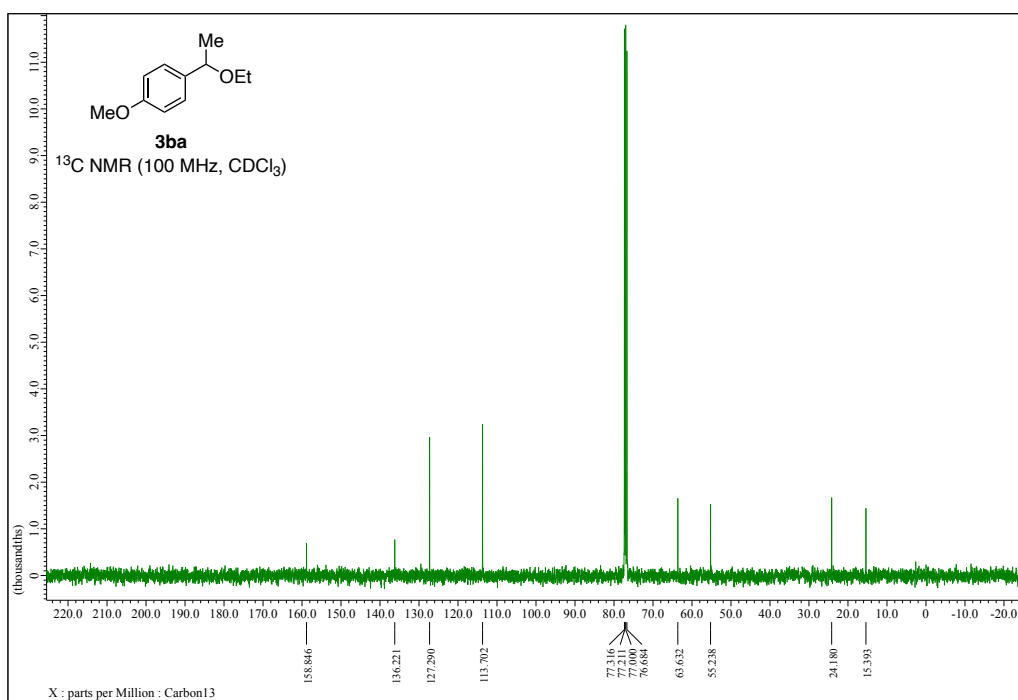

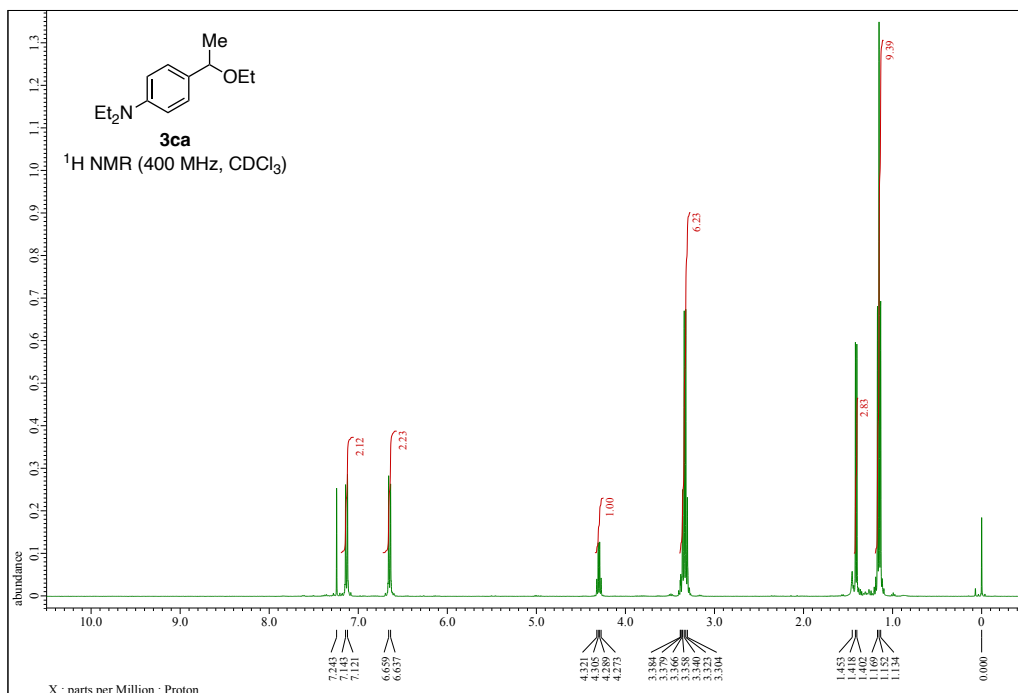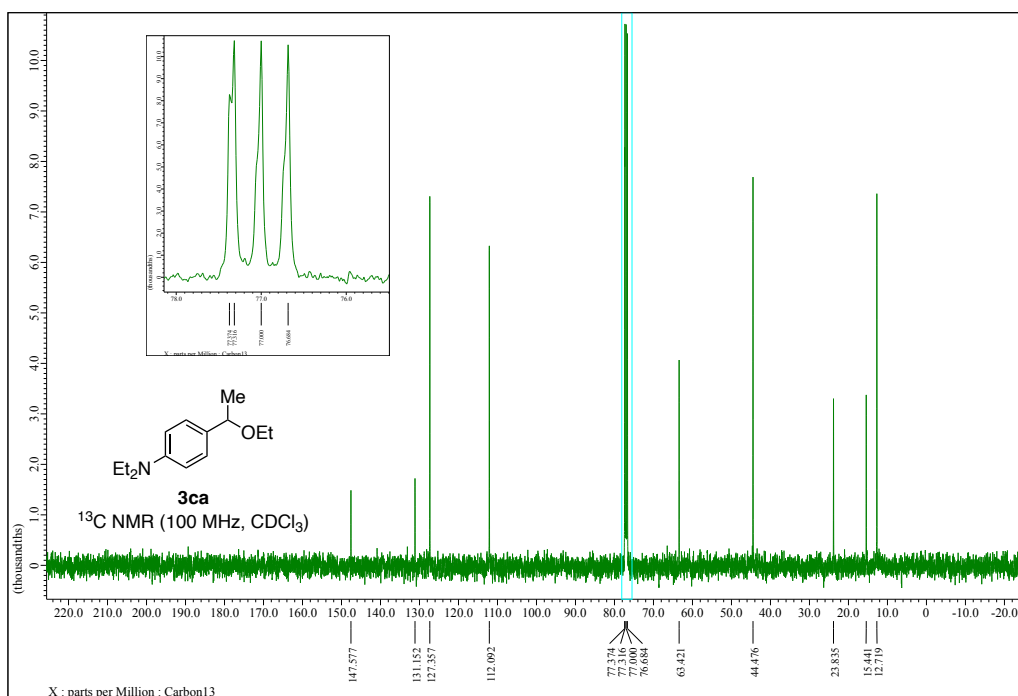

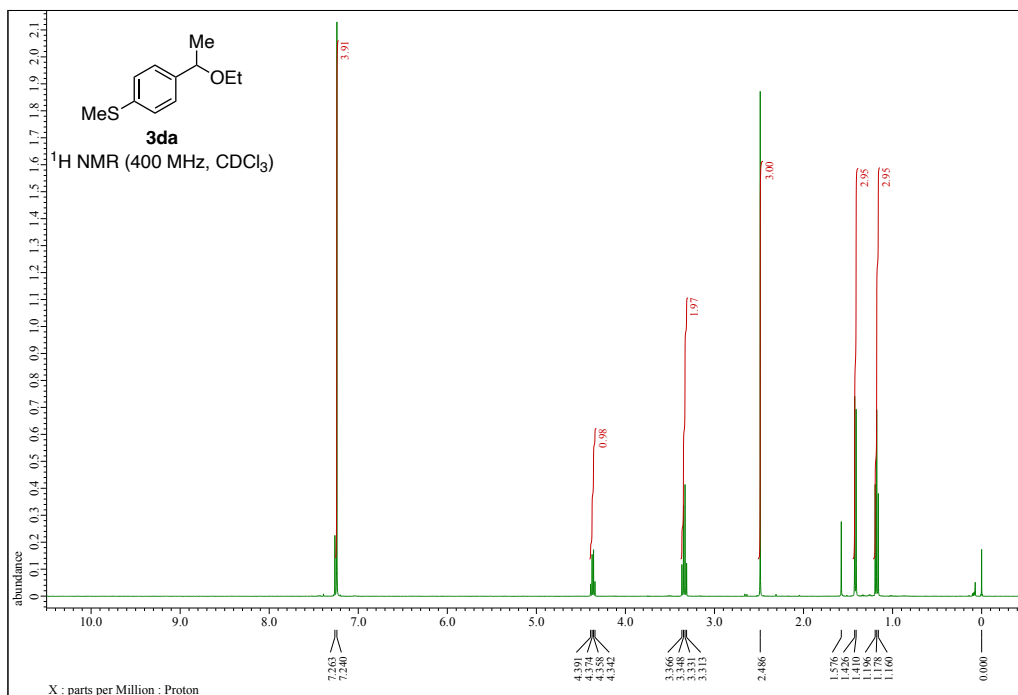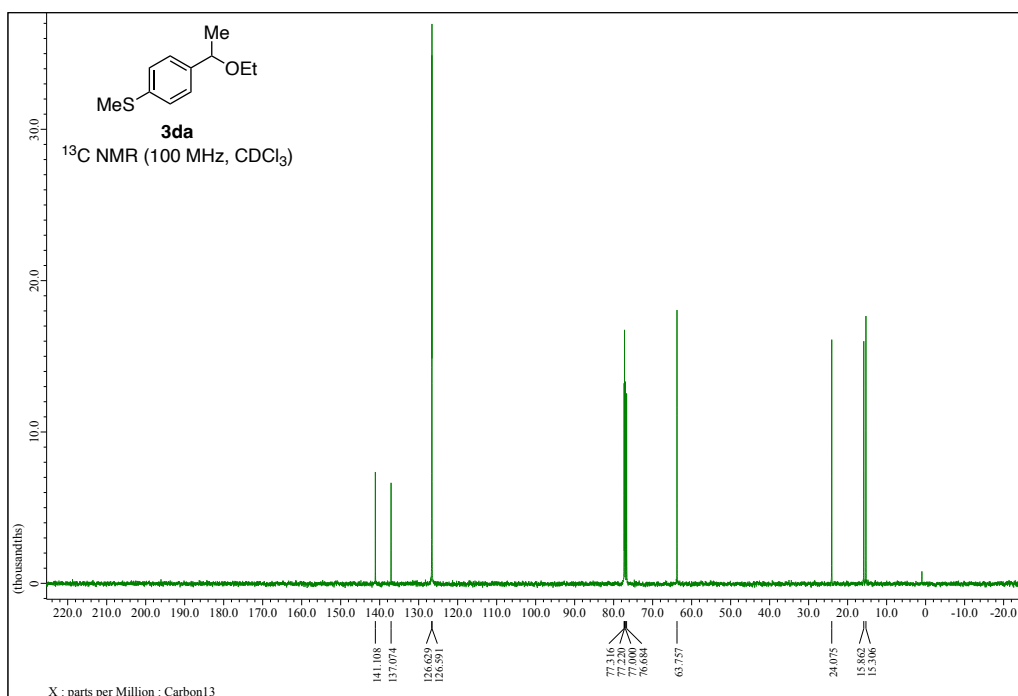

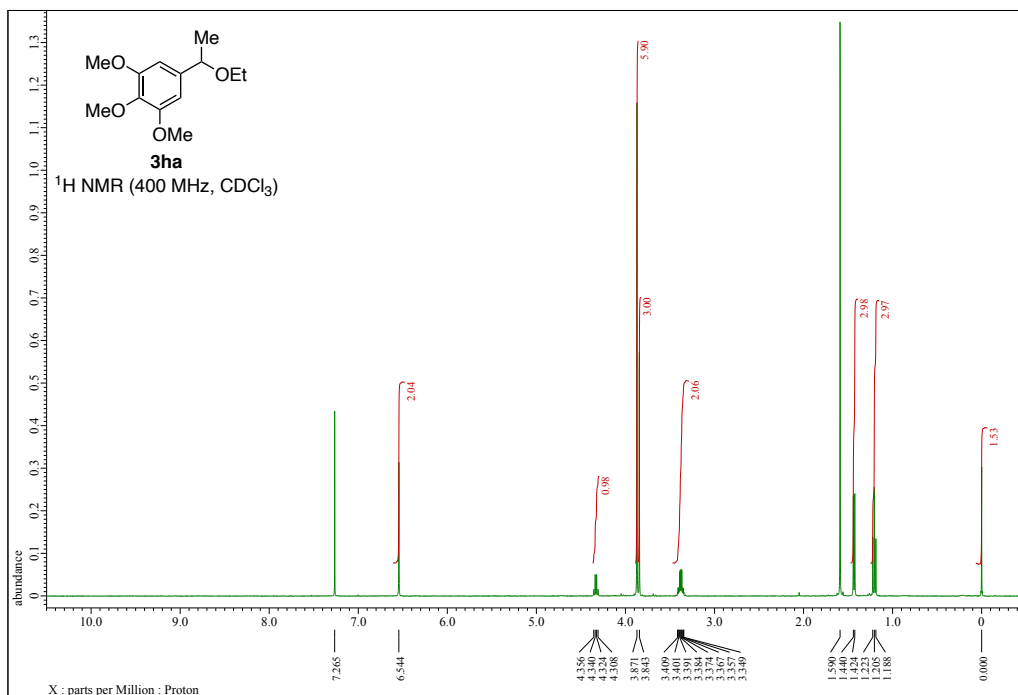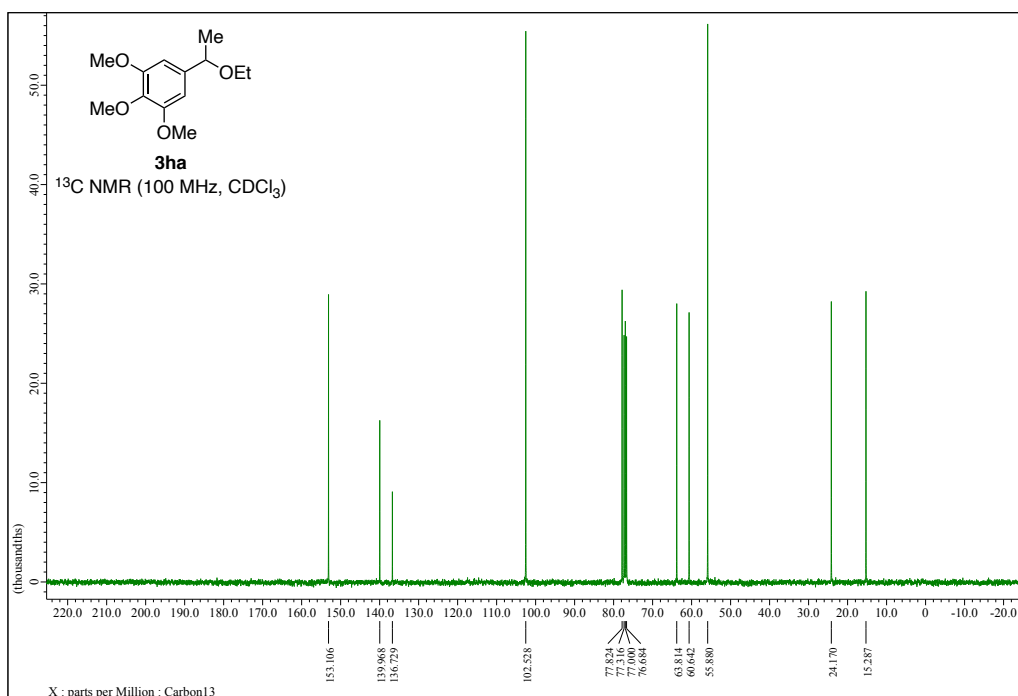

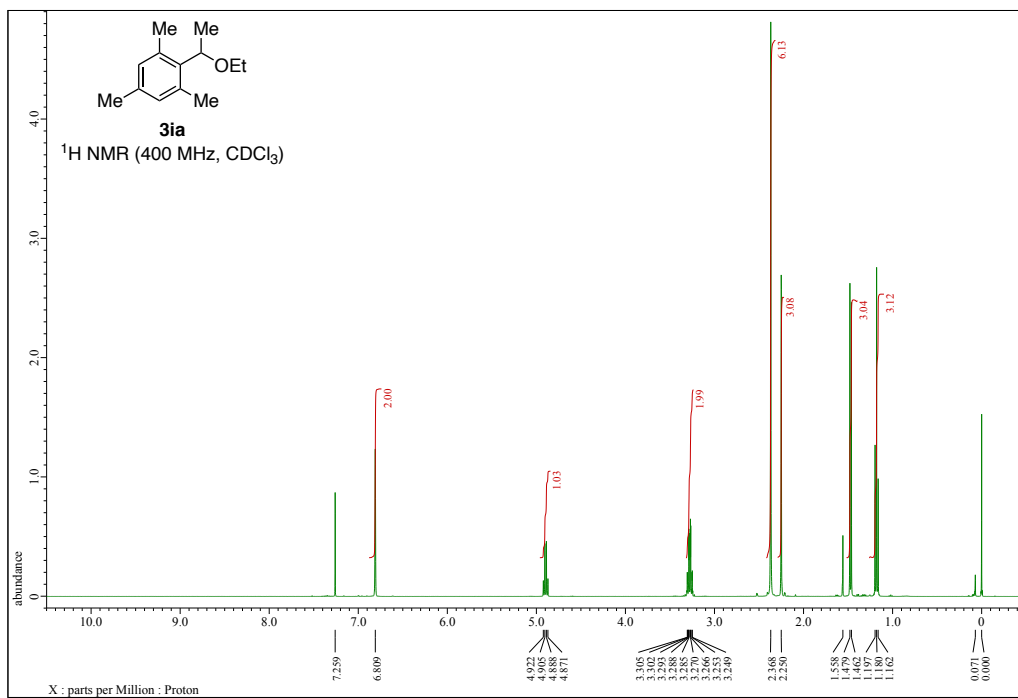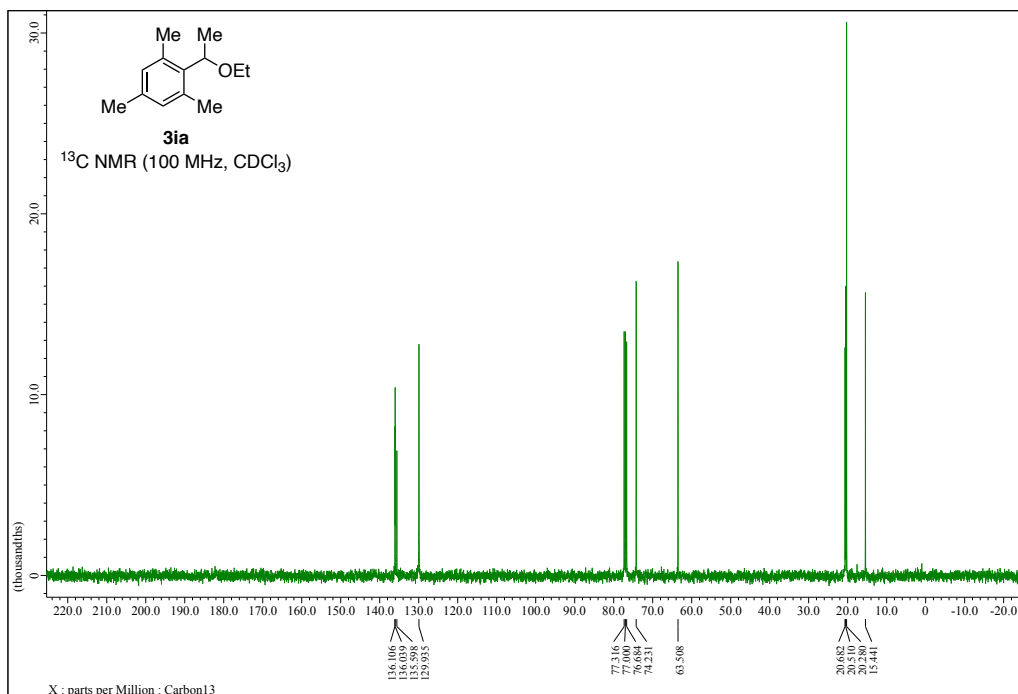



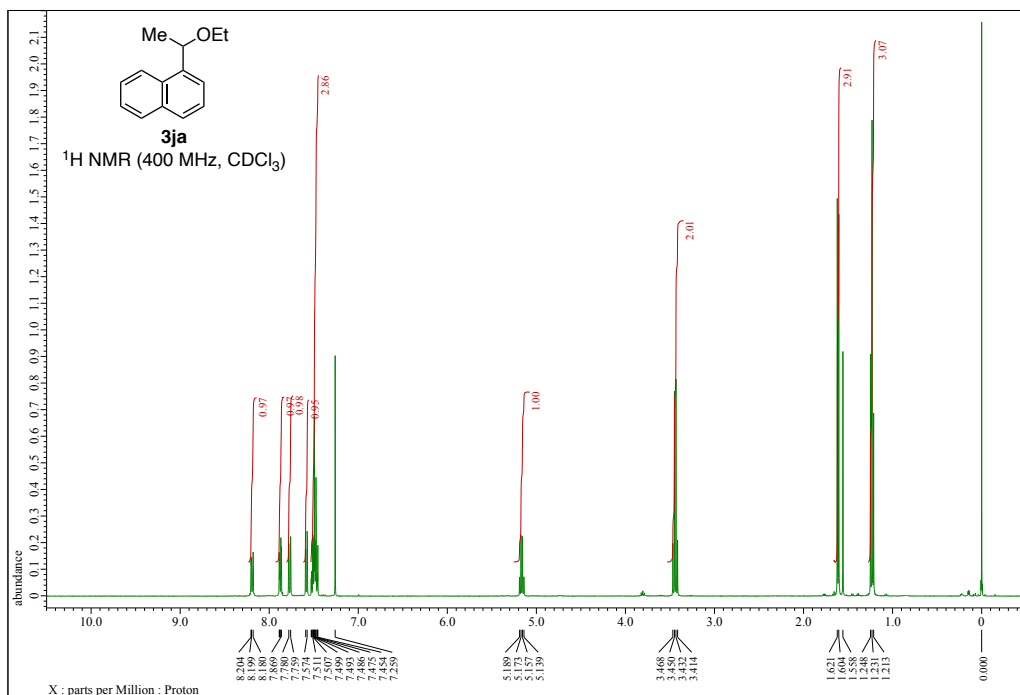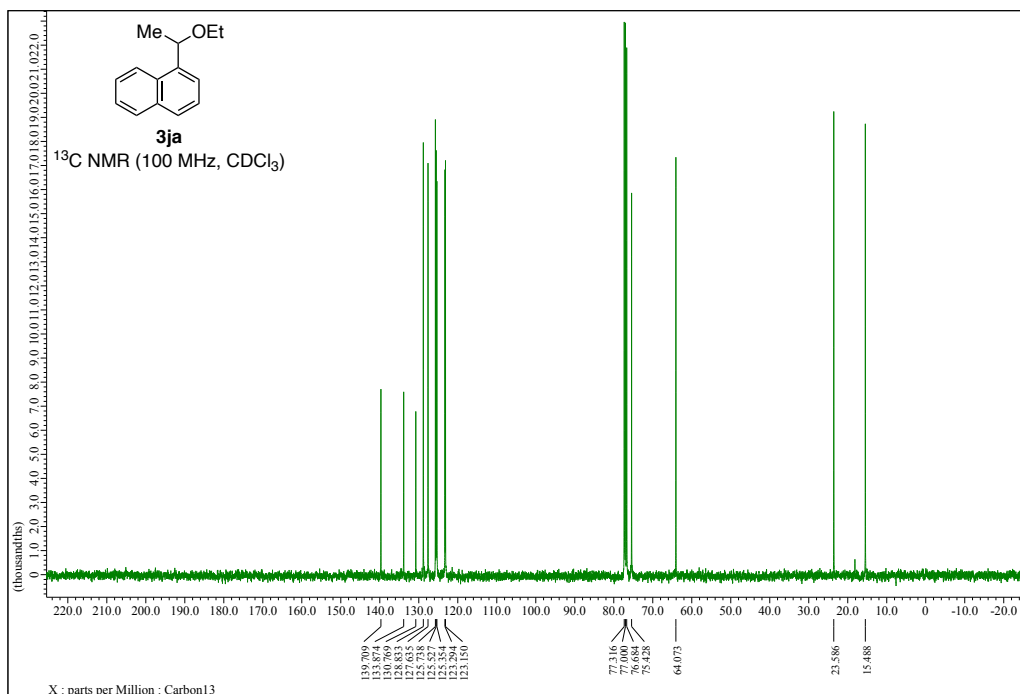

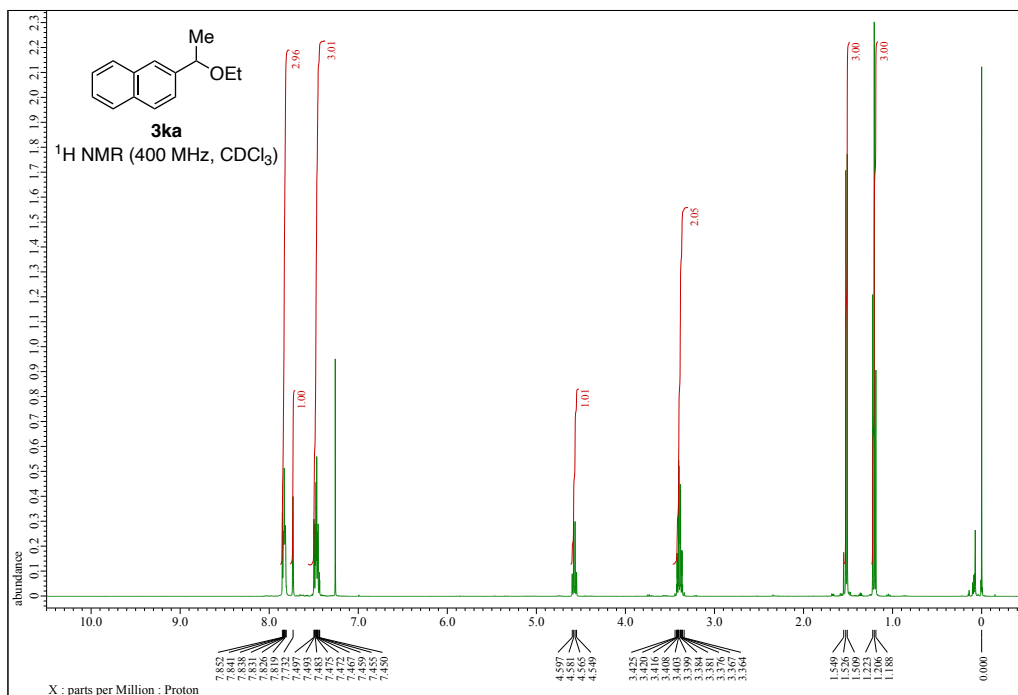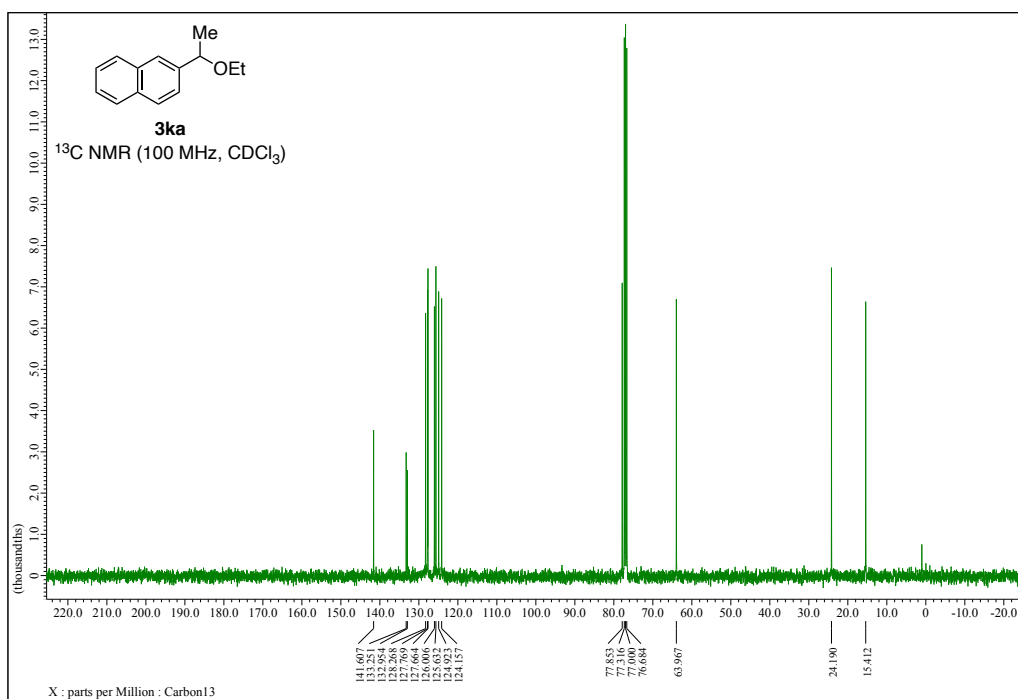

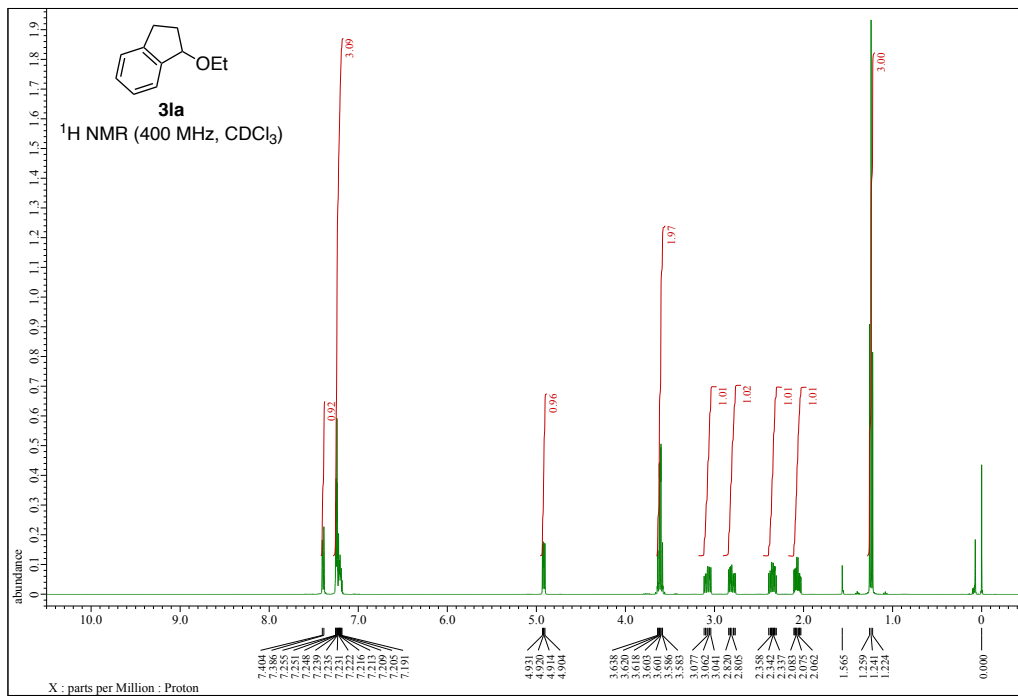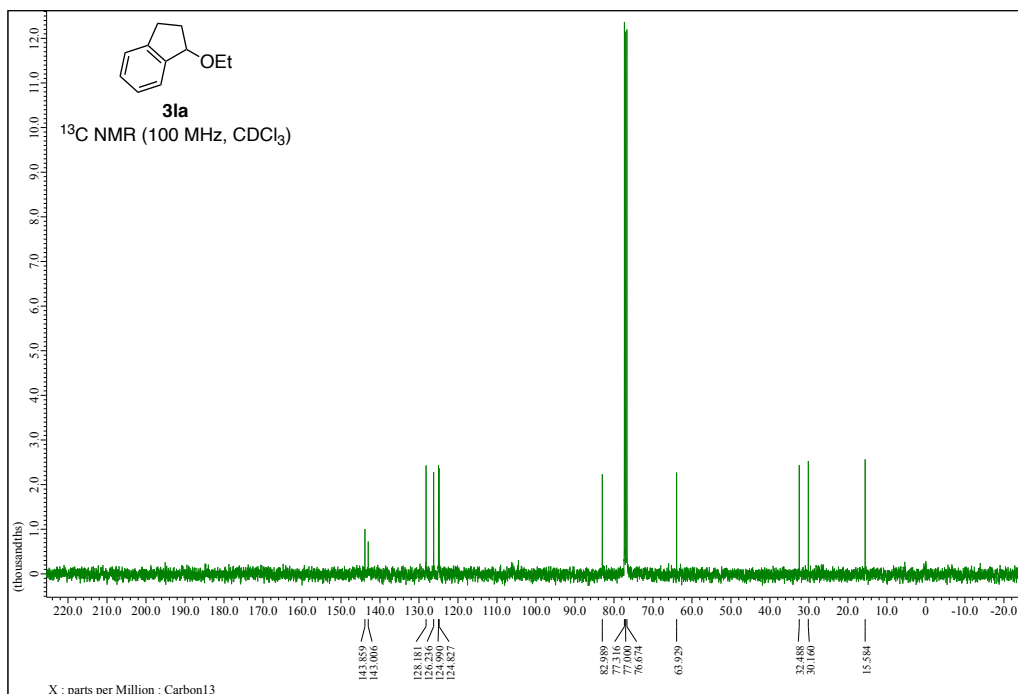

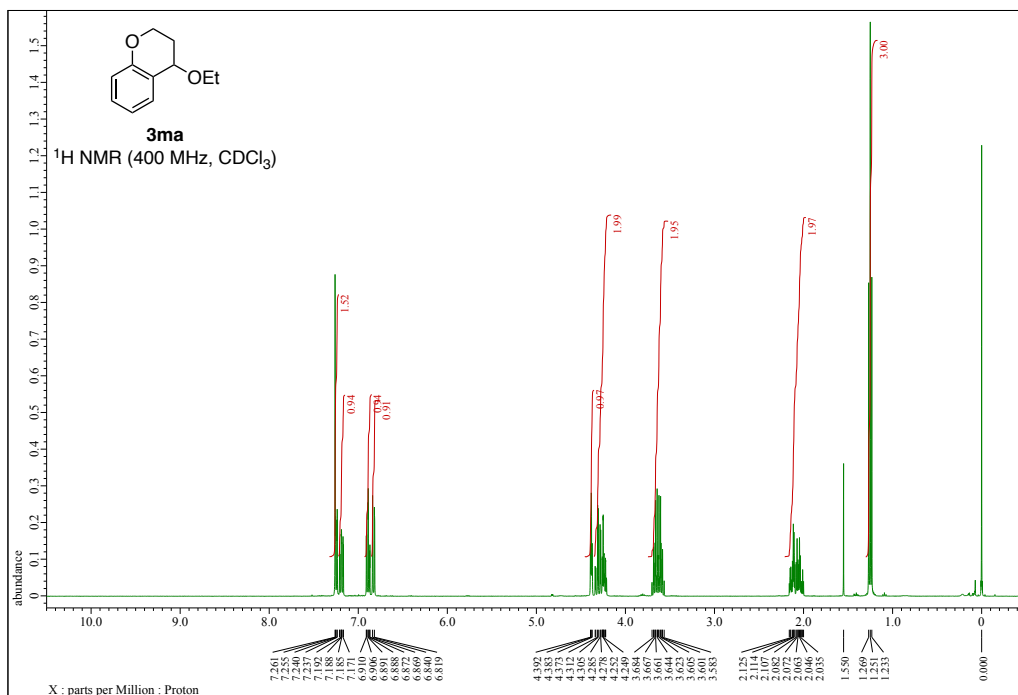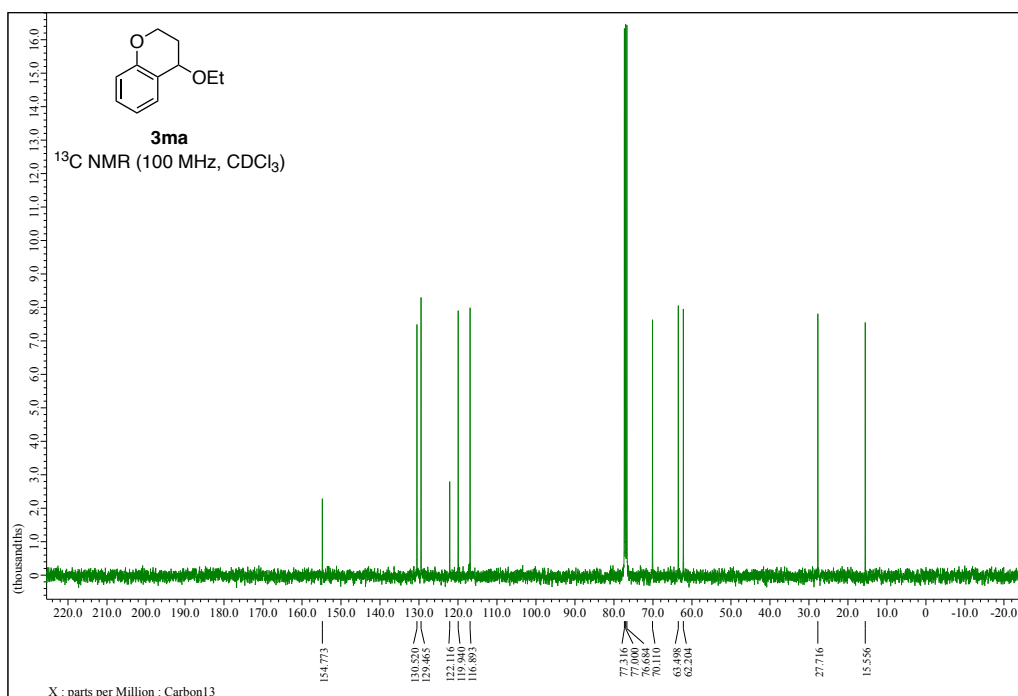

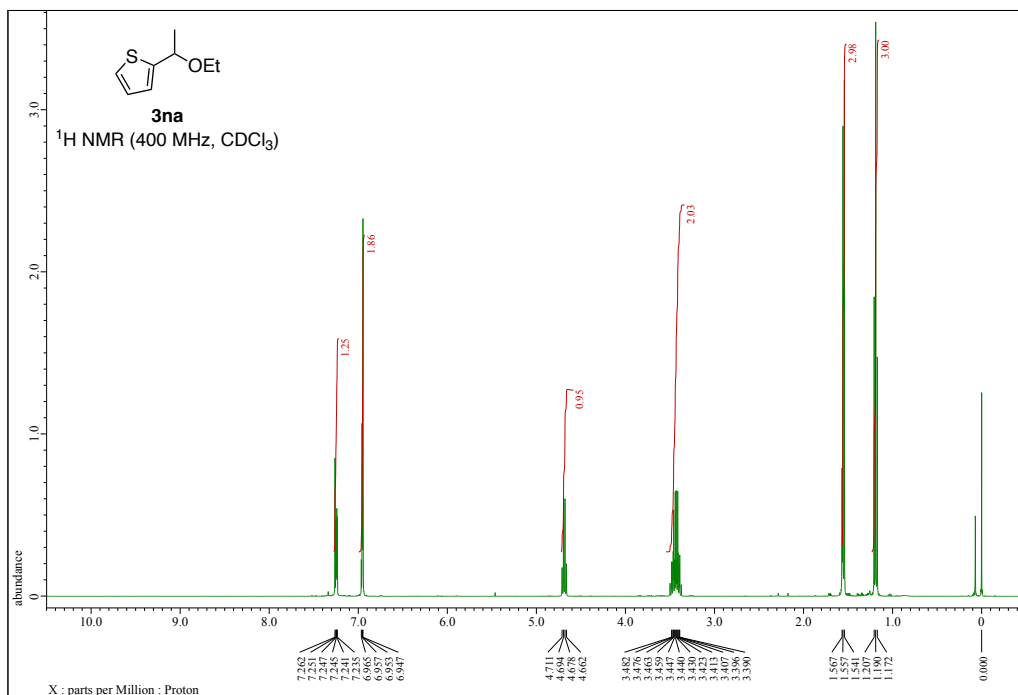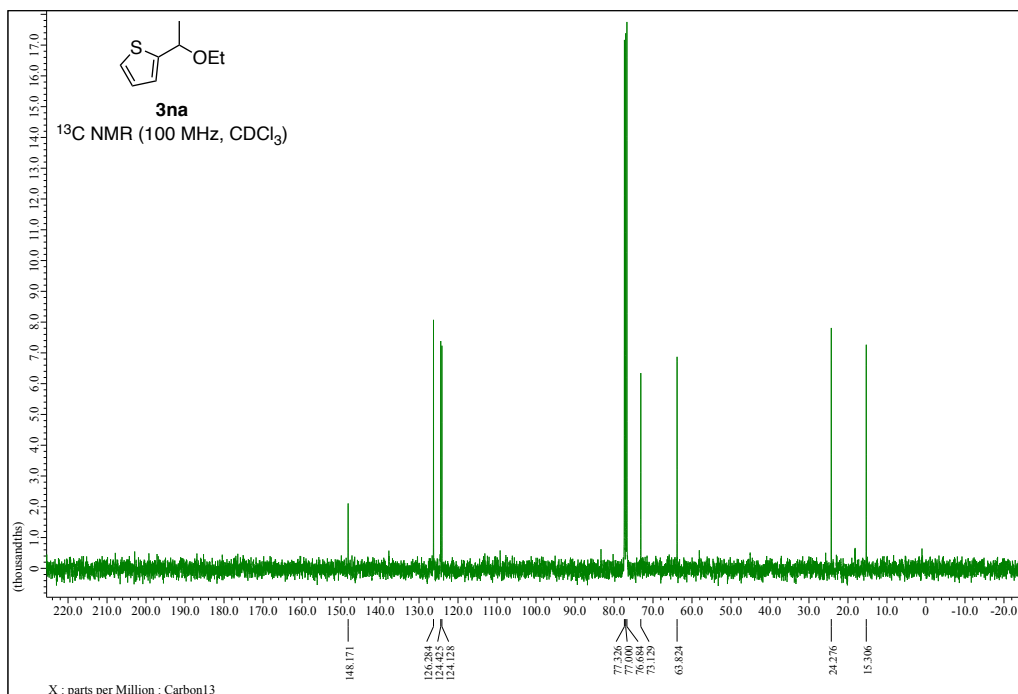

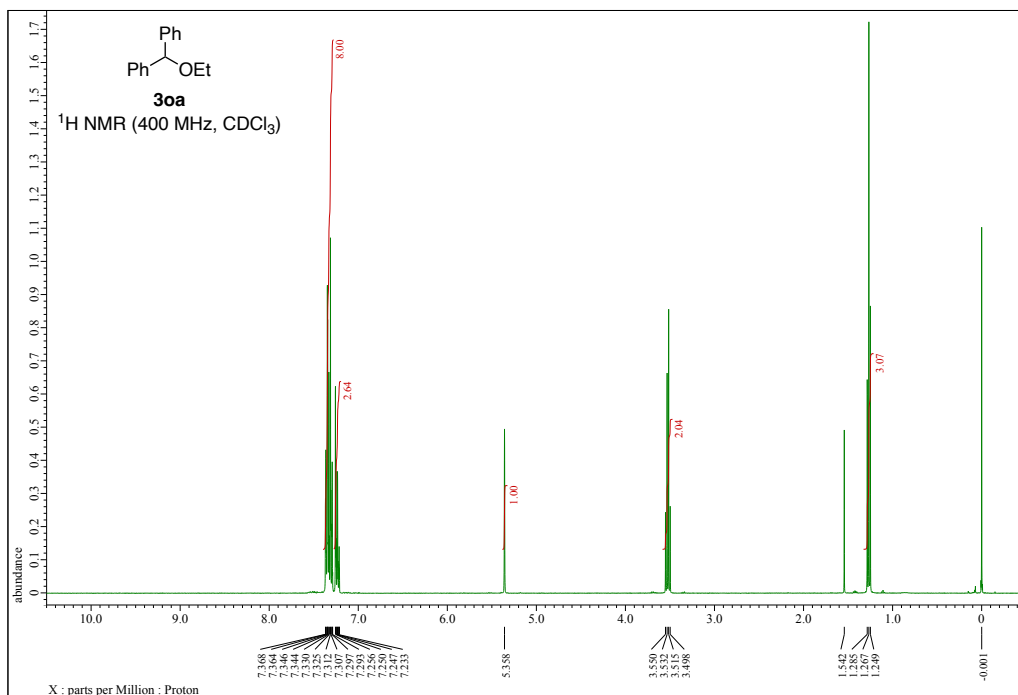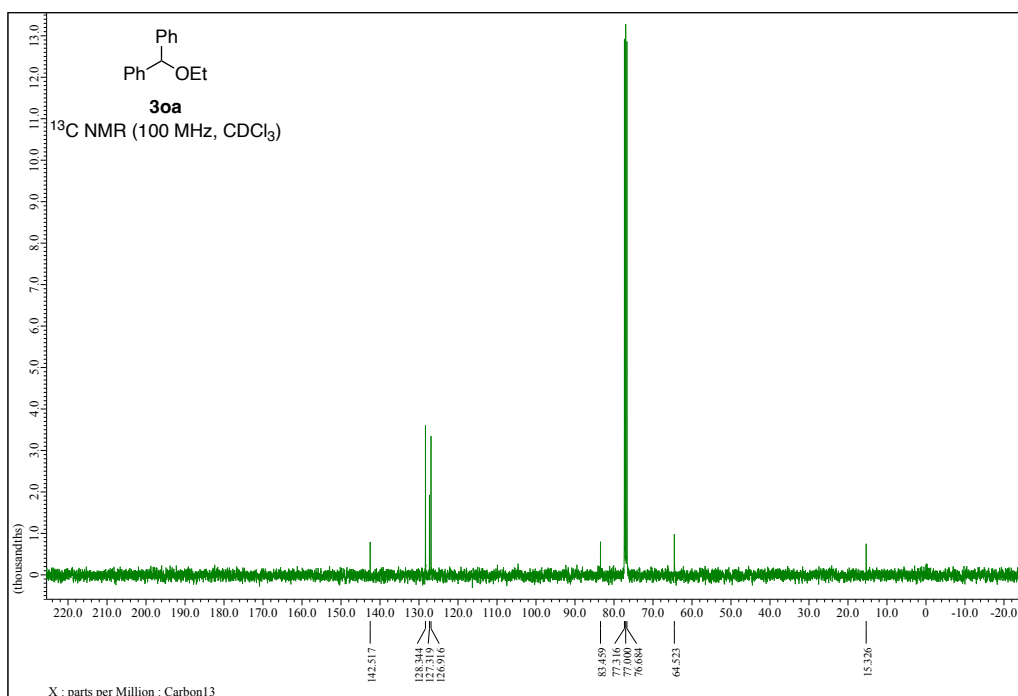

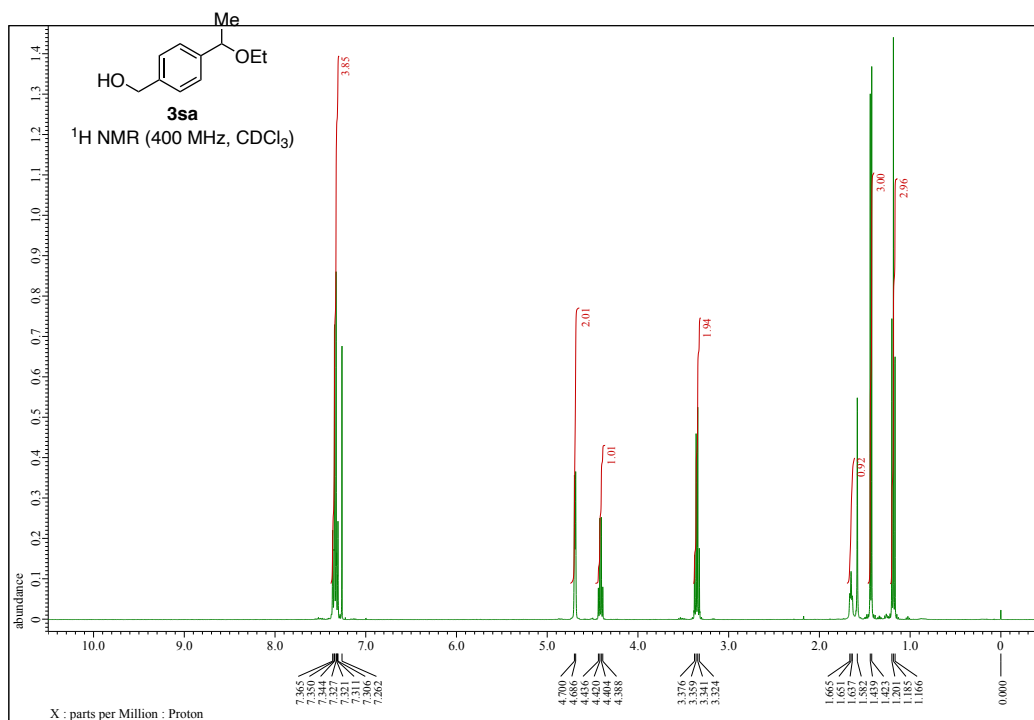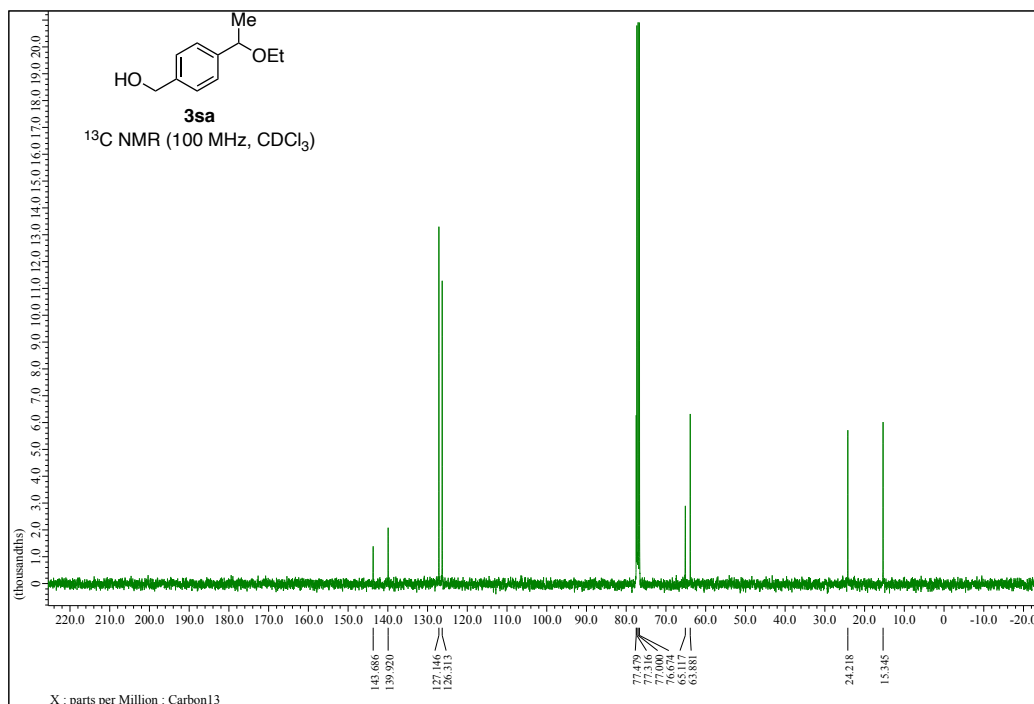

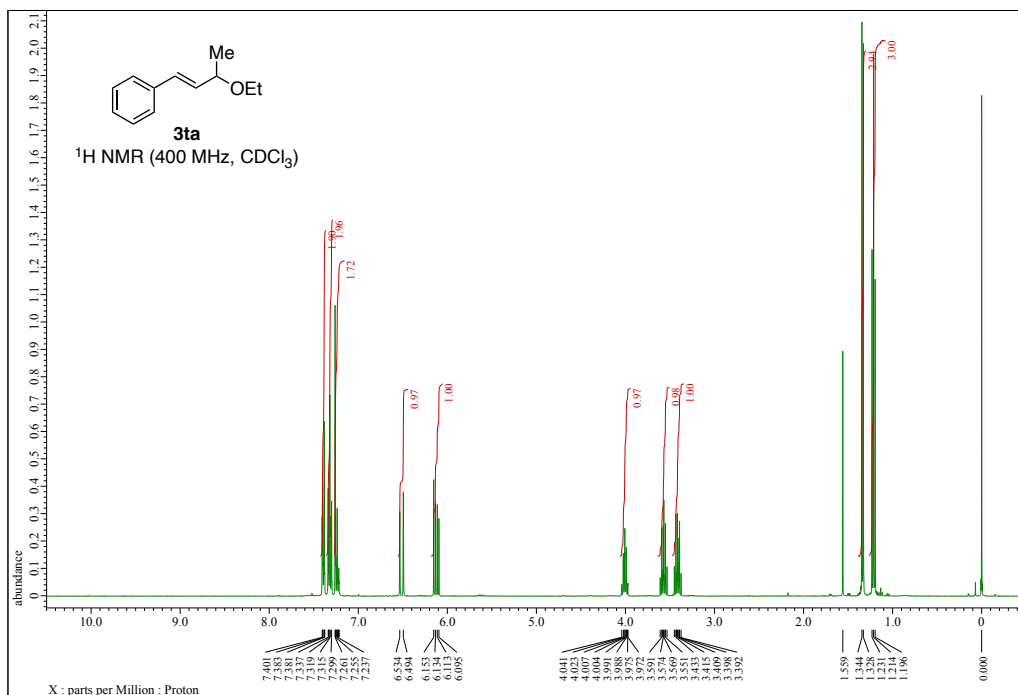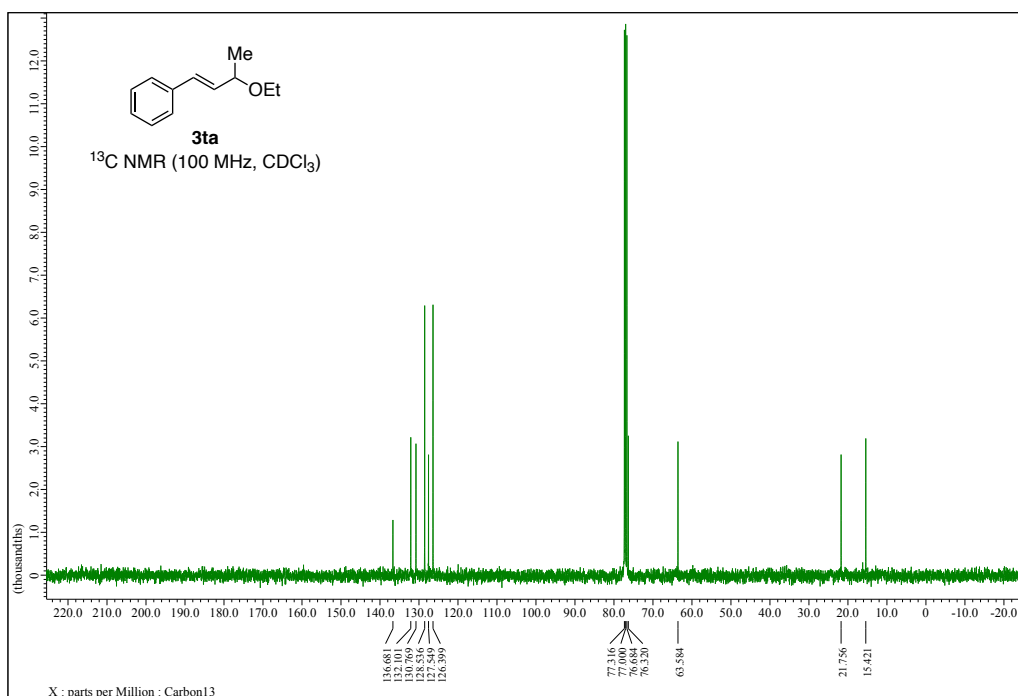



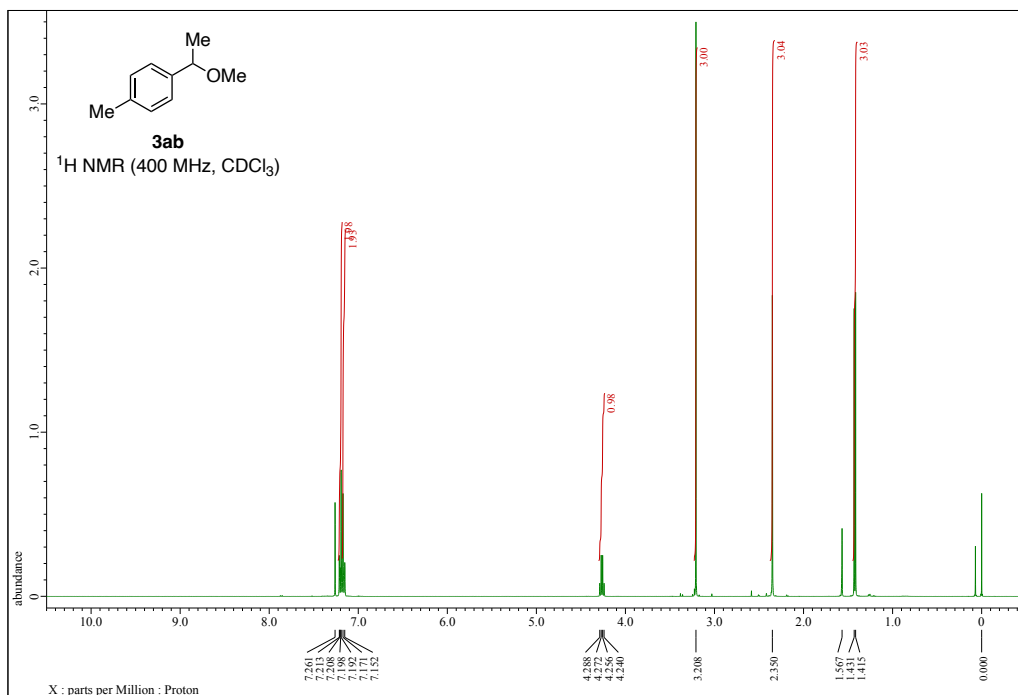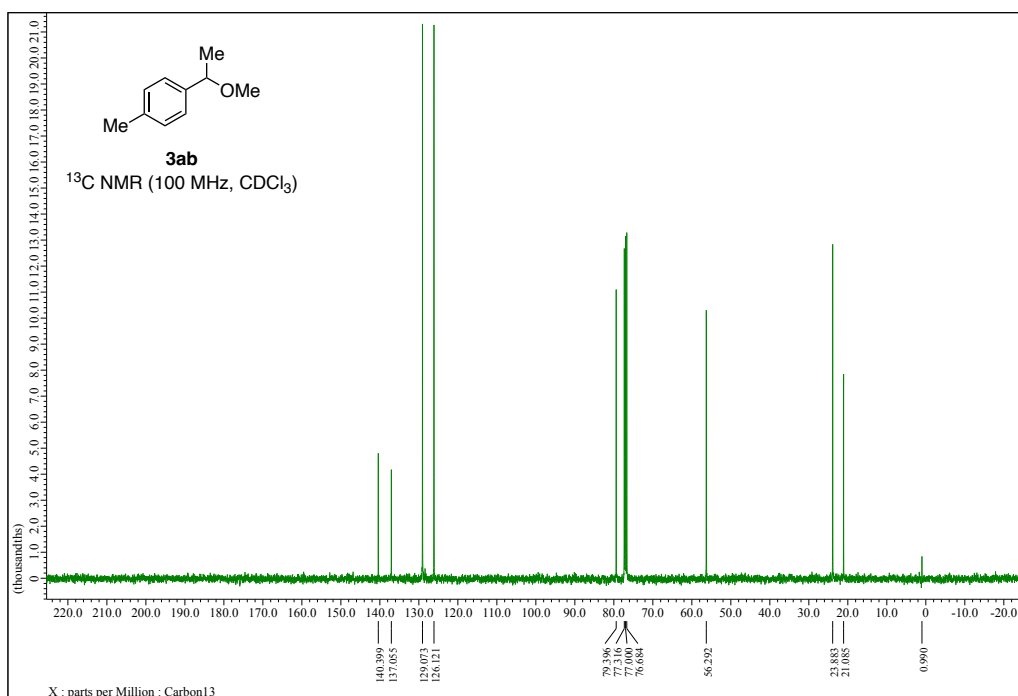

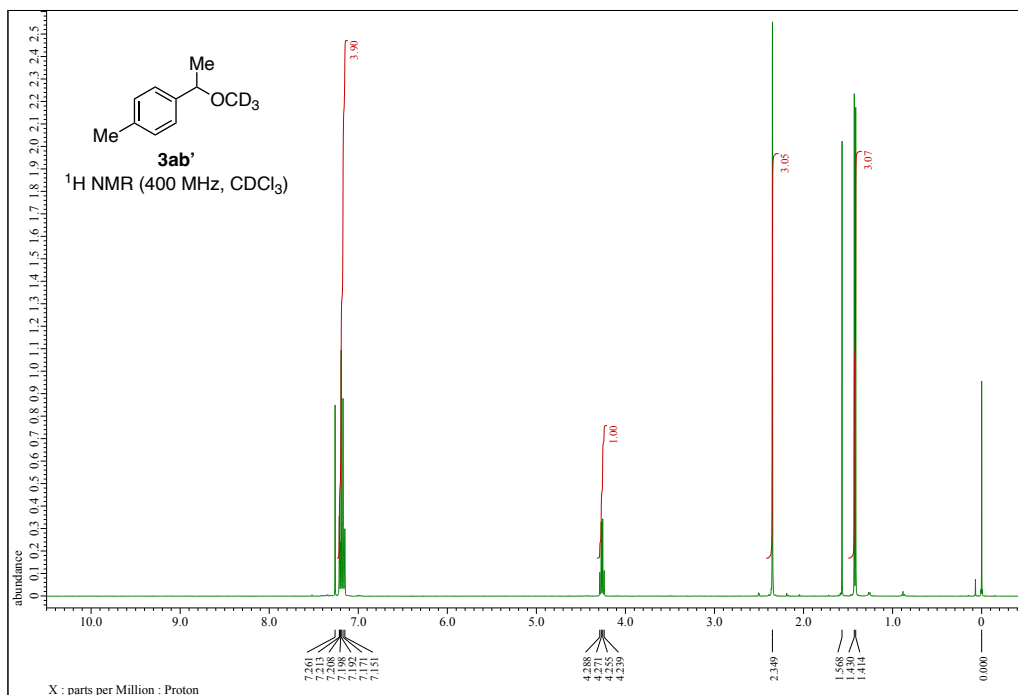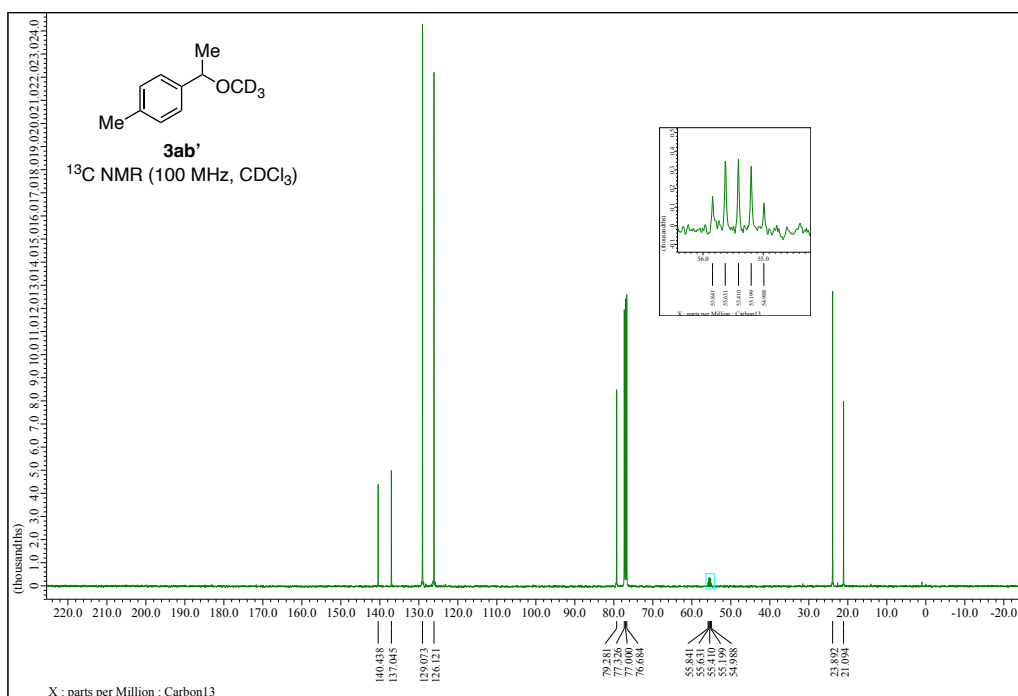

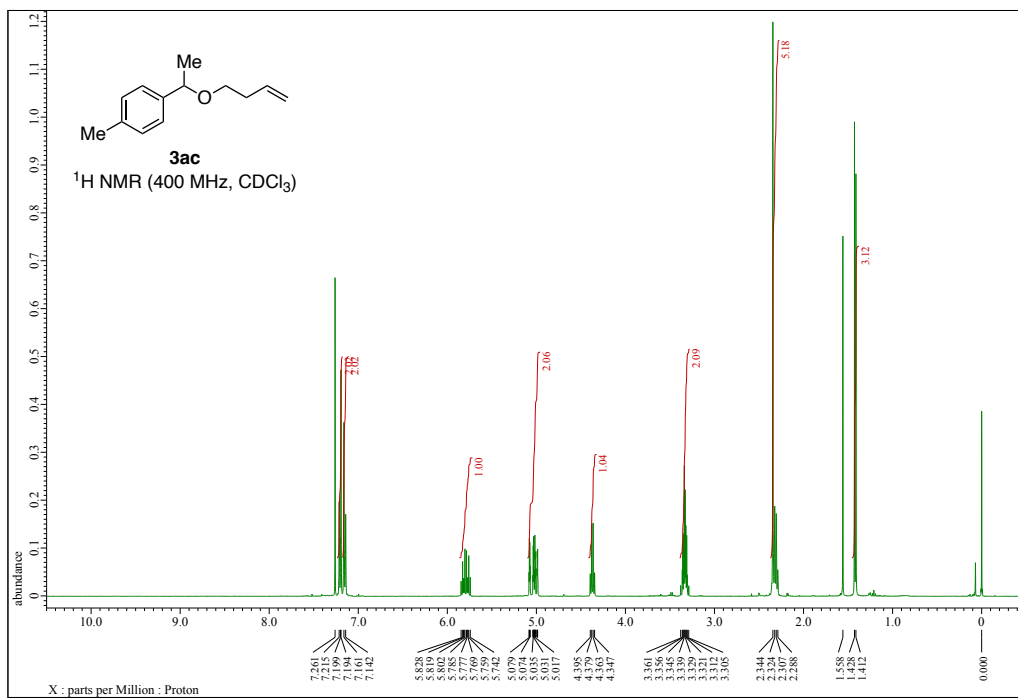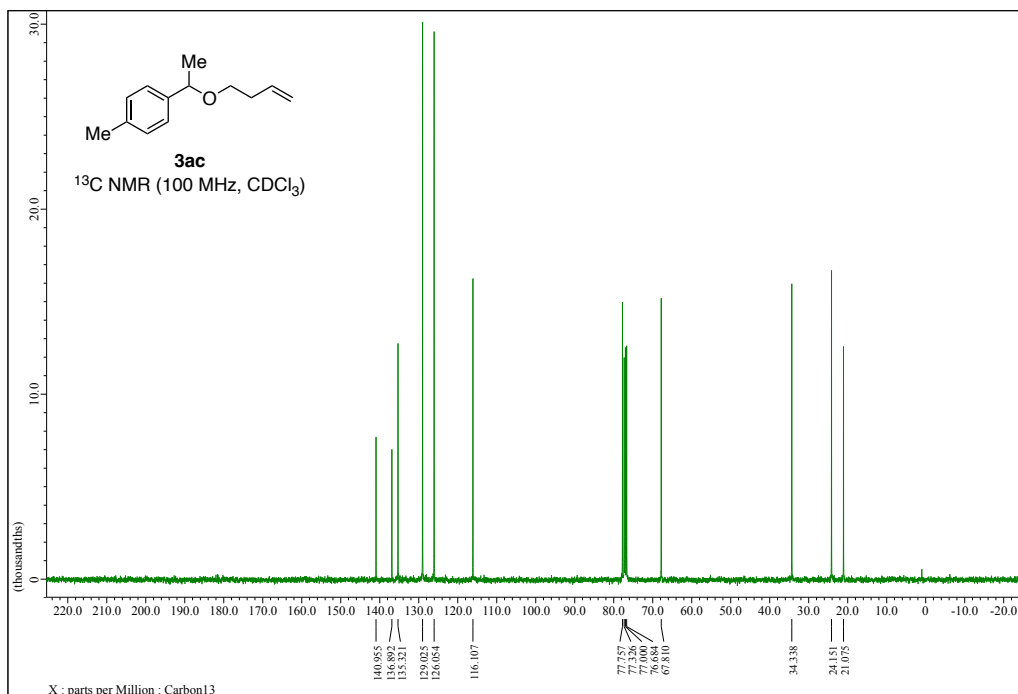

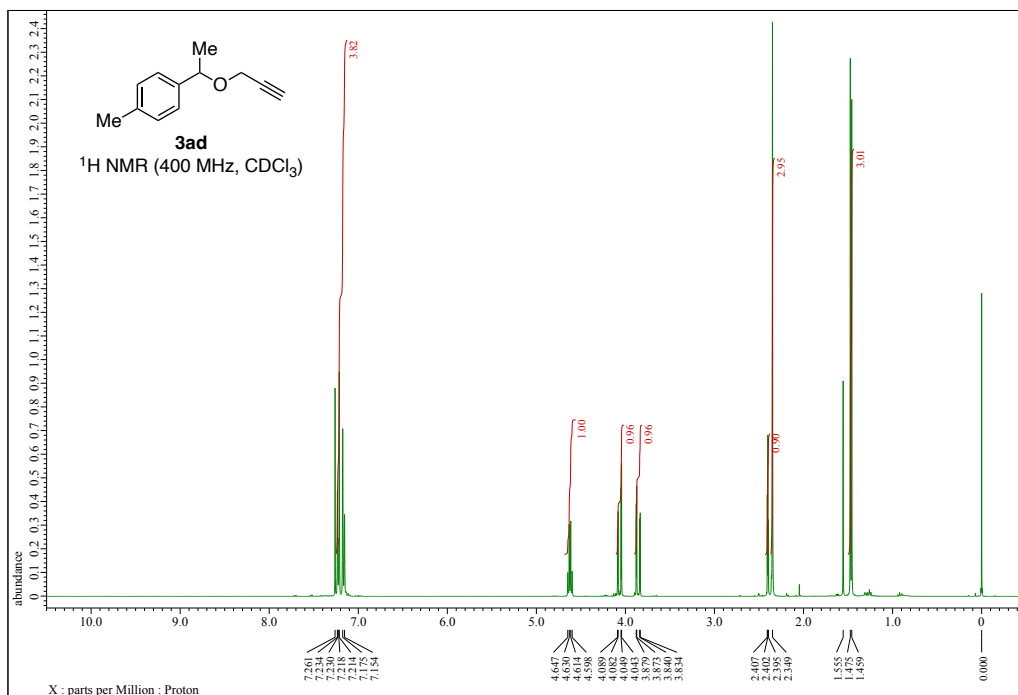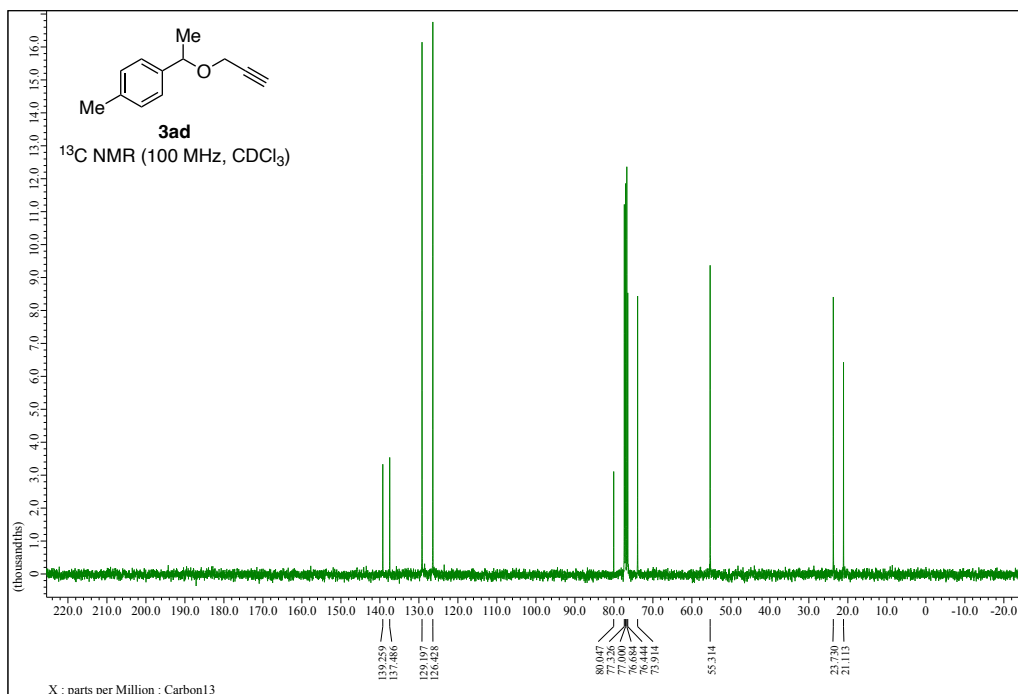

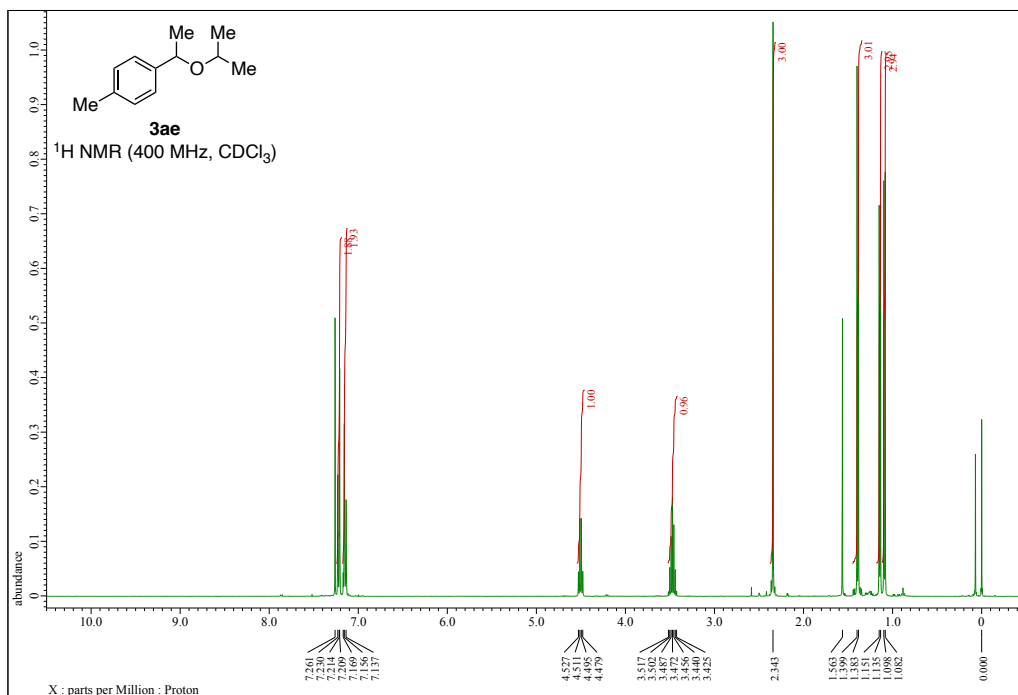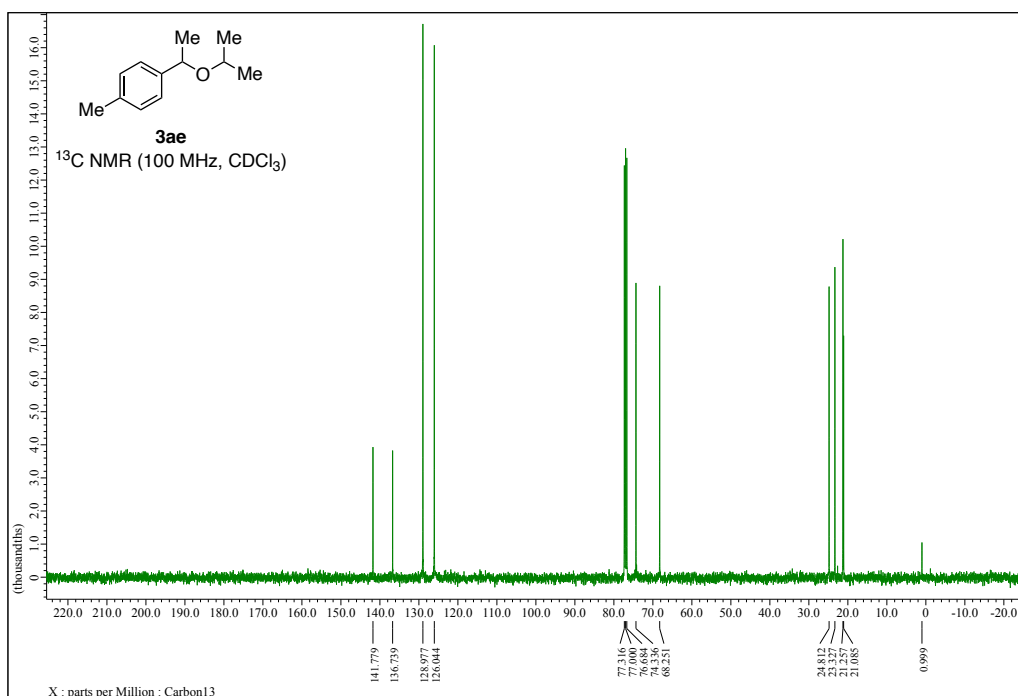

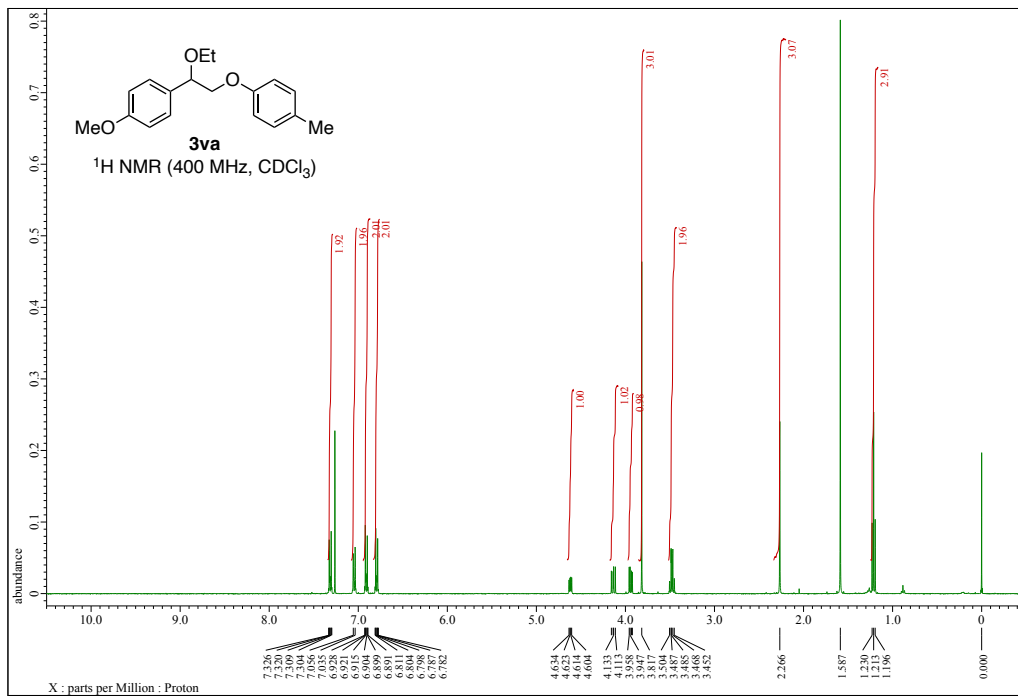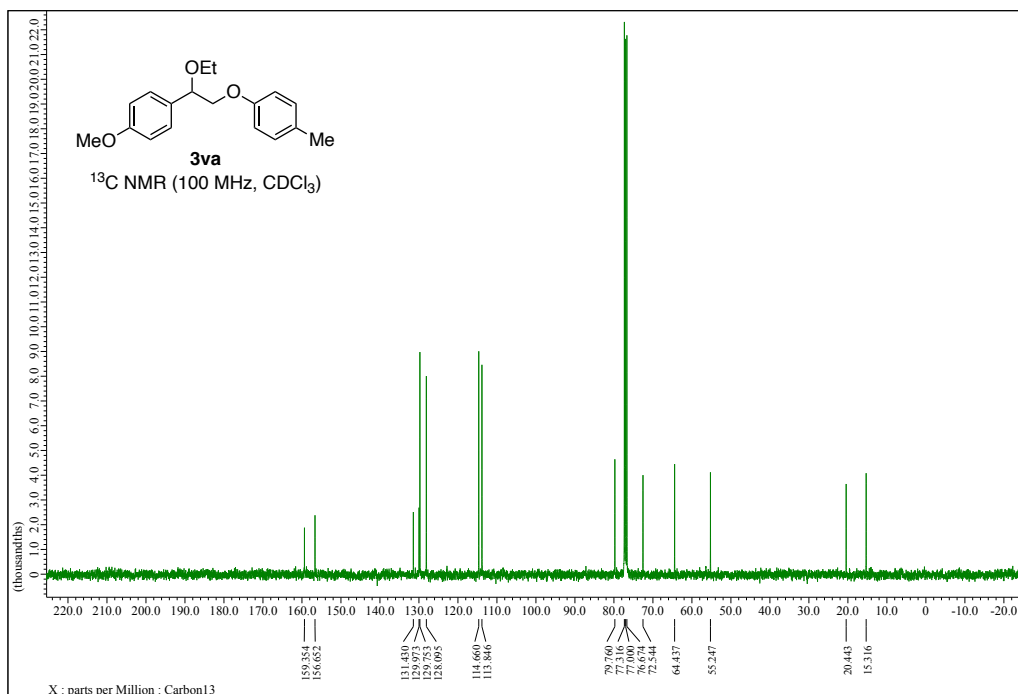

Supplement: d4ra05997b1.pdf [file d4ra05997b1.pdf]
